# Supplementary material for: Manganese(iii) acetate-mediated synthesis of N-substituted fulleropyrrolines via the reaction of [60]fullerene with α-monosubstituted acetaldehydes and primary amines
Source: Royal Society of Chemistry journal article supplement (doi:10.1039/d1ob01933c), 2021-01-01

# **Electronic Supplementary Information**

## **Manganese(III) acetate-mediated synthesis of *N*-substituted fulleropyrrolines via the reaction of [60]fullerene with $\alpha$ -monosubstituted acetaldehydes and primary amines**

Rui Sun,<sup>‡a</sup> Ming-Ding Chai,<sup>‡a</sup> Xiong Liu,<sup>b</sup> Ying Wang,<sup>a</sup> Fa-Bao Li,<sup>\*a</sup> Xiu-Shan Liu,<sup>a</sup>  
Xu-Feng Liu,<sup>\*a</sup> Li Liu,<sup>a</sup> and Abdullah M. Asiri<sup>c</sup>

*<sup>a</sup>Collaborative Innovation Center for Advanced Organic Chemical Materials Co-constructed by the Province and Ministry, Ministry of Education Key Laboratory for the Synthesis and Application of Organic Functional Molecules, Hubei University,*

*Wuhan 430062, People's Republic of China*

*E-mail: lfb0615@hubu.edu.cn and liuxf506@163.com*

*<sup>b</sup>Hubei Ecological Environmental Monitoring Center Station*

*<sup>c</sup>Department of Chemistry, Faculty of Science, King Abdulaziz University, Jeddah*

*21589, Saudi Arabia*

*<sup>‡</sup>These authors contributed equally to this work.*

|                                                     |         |
|-----------------------------------------------------|---------|
| Typical MALDI-TOF MS of fulleropyrrolines           | S4-S5   |
| Typical UV-vis spectra of fulleropyrrolines         | S6-S7   |
| <sup>1</sup> H NMR spectrum of compound <b>3aa</b>  | S8      |
| <sup>13</sup> C NMR spectrum of compound <b>3aa</b> | S8-S9   |
| <sup>1</sup> H NMR spectrum of compound <b>3ba</b>  | S9      |
| <sup>13</sup> C NMR spectrum of compound <b>3ba</b> | S10     |
| <sup>1</sup> H NMR spectrum of compound <b>3ca</b>  | S11     |
| <sup>13</sup> C NMR spectrum of compound <b>3ca</b> | S11-S12 |
| <sup>1</sup> H NMR spectrum of compound <b>3da</b>  | S12     |
| <sup>13</sup> C NMR spectrum of compound <b>3da</b> | S13     |
| <sup>1</sup> H NMR spectrum of compound <b>3ea</b>  | S14     |
| <sup>13</sup> C NMR spectrum of compound <b>3ea</b> | S14-S15 |
| <sup>1</sup> H NMR spectrum of compound <b>3fa</b>  | S15     |
| <sup>13</sup> C NMR spectrum of compound <b>3fa</b> | S16     |
| <sup>1</sup> H NMR spectrum of compound <b>3ga</b>  | S17     |
| <sup>13</sup> C NMR spectrum of compound <b>3ga</b> | S17-S18 |
| <sup>1</sup> H NMR spectrum of compound <b>3ha</b>  | S18     |
| <sup>13</sup> C NMR spectrum of compound <b>3ha</b> | S19     |
| <sup>1</sup> H NMR spectrum of compound <b>3ia</b>  | S20     |
| <sup>13</sup> C NMR spectrum of compound <b>3ia</b> | S20-S21 |
| <sup>1</sup> H NMR spectrum of compound <b>3ja</b>  | S21     |
| <sup>13</sup> C NMR spectrum of compound <b>3ja</b> | S22     |
| <sup>1</sup> H NMR spectrum of compound <b>3ka</b>  | S23     |
| <sup>13</sup> C NMR spectrum of compound <b>3ka</b> | S23-S24 |
| <sup>1</sup> H NMR spectrum of compound <b>3ab</b>  | S24     |
| <sup>13</sup> C NMR spectrum of compound <b>3ab</b> | S25     |
| <sup>1</sup> H NMR spectrum of compound <b>3la</b>  | S26     |
| <sup>13</sup> C NMR spectrum of compound <b>3la</b> | S26-S27 |
| <sup>1</sup> H NMR spectrum of compound <b>3lb</b>  | S27     |
| <sup>13</sup> C NMR spectrum of compound <b>3lb</b> | S28     |
| <sup>1</sup> H NMR spectrum of compound <b>3lc</b>  | S29     |
| <sup>13</sup> C NMR spectrum of compound <b>3lc</b> | S29-S30 |
| <sup>1</sup> H NMR spectrum of compound <b>3ld</b>  | S30     |
| <sup>13</sup> C NMR spectrum of compound <b>3ld</b> | S31     |
| <sup>1</sup> H NMR spectrum of compound <b>3le</b>  | S32     |
| <sup>13</sup> C NMR spectrum of compound <b>3le</b> | S32-S33 |
| <sup>1</sup> H NMR spectrum of compound <b>3lf</b>  | S33     |
| <sup>13</sup> C NMR spectrum of compound <b>3lf</b> | S34     |
| <sup>1</sup> H NMR spectrum of compound <b>3lg</b>  | S35     |
| <sup>13</sup> C NMR spectrum of compound <b>3lg</b> | S35-S36 |
| <sup>1</sup> H NMR spectrum of compound <b>3lh</b>  | S36     |
| <sup>13</sup> C NMR spectrum of compound <b>3lh</b> | S37     |
| <sup>1</sup> H NMR spectrum of compound <b>3li</b>  | S38     |
| <sup>13</sup> C NMR spectrum of compound <b>3li</b> | S38-S39 |

|                                                     |         |
|-----------------------------------------------------|---------|
| <sup>1</sup> H NMR spectrum of compound <b>5aa</b>  | S39     |
| <sup>13</sup> C NMR spectrum of compound <b>5aa</b> | S40     |
| <sup>1</sup> H NMR spectrum of compound <b>5ab</b>  | S41     |
| <sup>13</sup> C NMR spectrum of compound <b>5ab</b> | S41-S42 |
| <sup>1</sup> H NMR spectrum of compound <b>5ac</b>  | S42     |
| <sup>13</sup> C NMR spectrum of compound <b>5ac</b> | S43     |
| <sup>1</sup> H NMR spectrum of compound <b>5ad</b>  | S44     |
| <sup>13</sup> C NMR spectrum of compound <b>5ad</b> | S44-S45 |
| <sup>1</sup> H NMR spectrum of compound <b>5ae</b>  | S45     |
| <sup>13</sup> C NMR spectrum of compound <b>5ae</b> | S46     |
| <sup>1</sup> H NMR spectrum of compound <b>5af</b>  | S47     |
| <sup>13</sup> C NMR spectrum of compound <b>5af</b> | S47-S48 |
| <sup>1</sup> H NMR spectrum of compound <b>5ag</b>  | S48     |
| <sup>13</sup> C NMR spectrum of compound <b>5ag</b> | S49     |
| <sup>1</sup> H NMR spectrum of compound <b>5ah</b>  | S50     |
| <sup>13</sup> C NMR spectrum of compound <b>5ah</b> | S50-S51 |
| <sup>1</sup> H NMR spectrum of compound <b>5ai</b>  | S51     |
| <sup>13</sup> C NMR spectrum of compound <b>5ai</b> | S52     |
| <sup>1</sup> H NMR spectrum of compound <b>5aj</b>  | S53     |
| <sup>13</sup> C NMR spectrum of compound <b>5aj</b> | S53-S54 |
| <sup>1</sup> H NMR spectrum of compound <b>5ak</b>  | S54     |
| <sup>13</sup> C NMR spectrum of compound <b>5ak</b> | S55     |
| <sup>1</sup> H NMR spectrum of compound <b>5al</b>  | S56     |
| <sup>13</sup> C NMR spectrum of compound <b>5al</b> | S56-S57 |
| <sup>1</sup> H NMR spectrum of compound <b>5am</b>  | S57     |
| <sup>13</sup> C NMR spectrum of compound <b>5am</b> | S58     |
| <sup>1</sup> H NMR spectrum of compound <b>5an</b>  | S59     |
| <sup>13</sup> C NMR spectrum of compound <b>5an</b> | S59-S60 |
| <sup>1</sup> H NMR spectrum of compound <b>5ao</b>  | S60     |
| <sup>13</sup> C NMR spectrum of compound <b>5ao</b> | S61     |
| <sup>1</sup> H NMR spectrum of compound <b>5ap</b>  | S62     |
| <sup>13</sup> C NMR spectrum of compound <b>5ap</b> | S62-S63 |

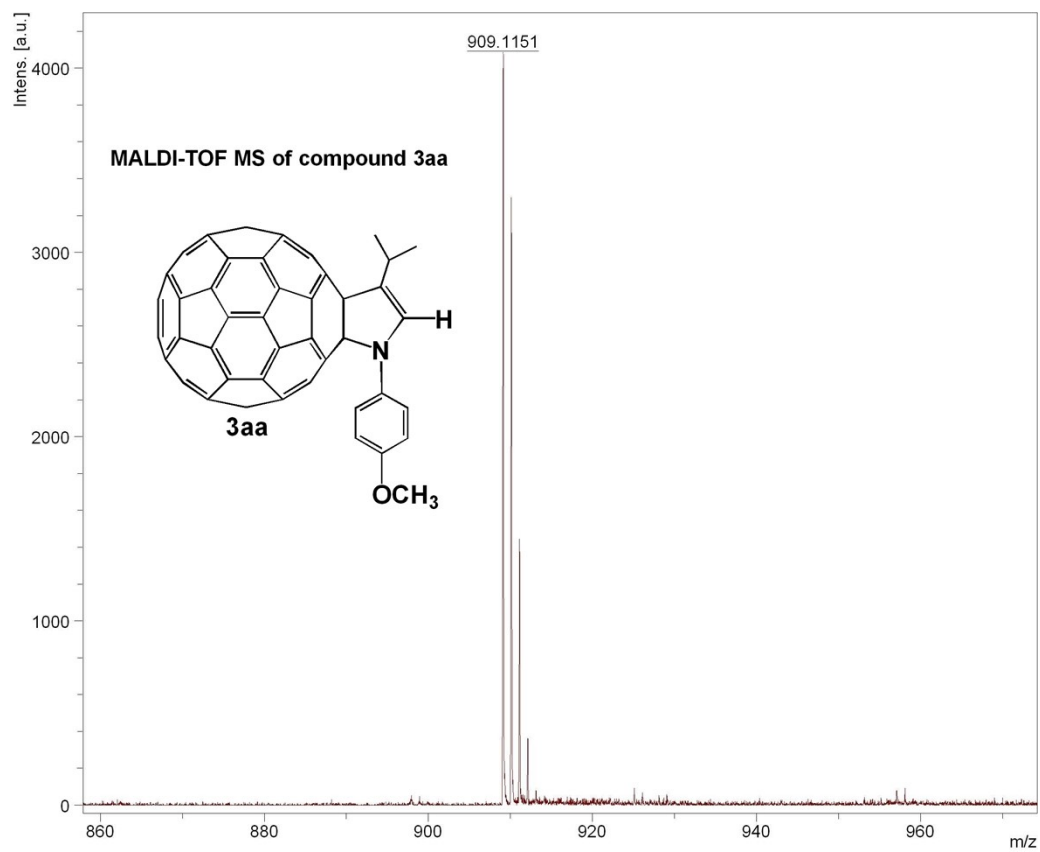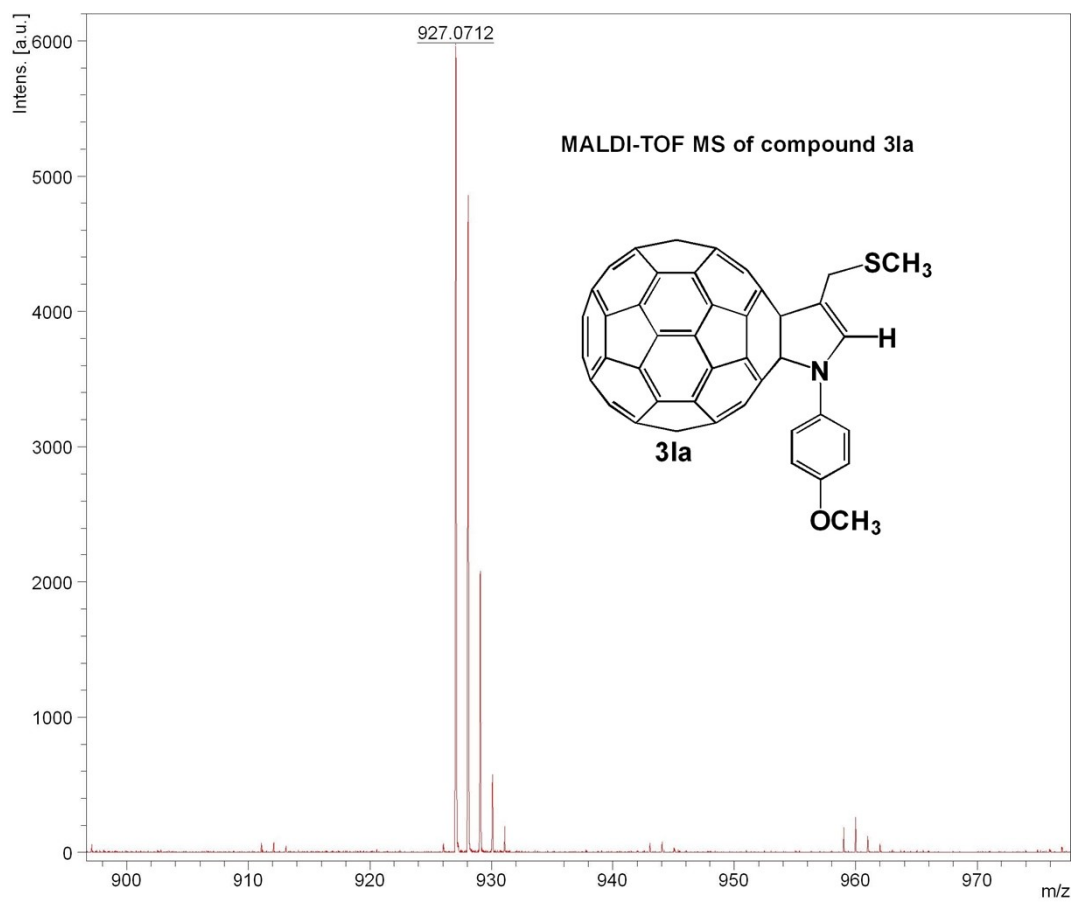



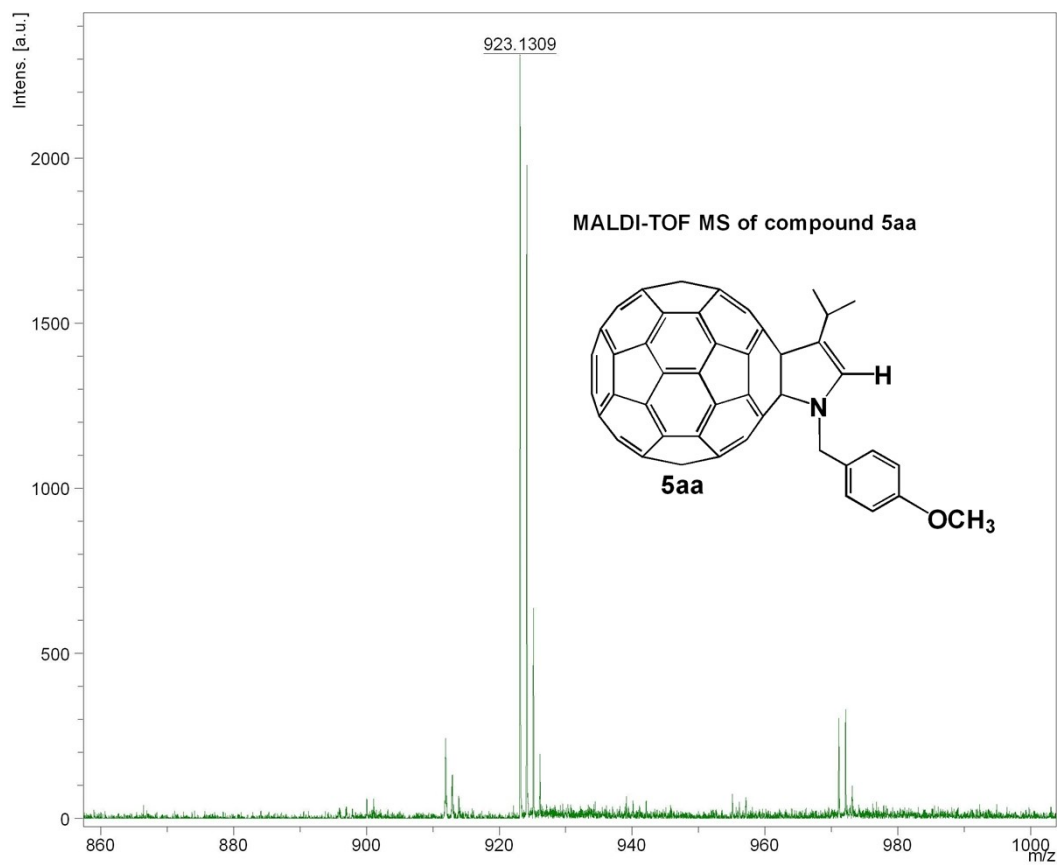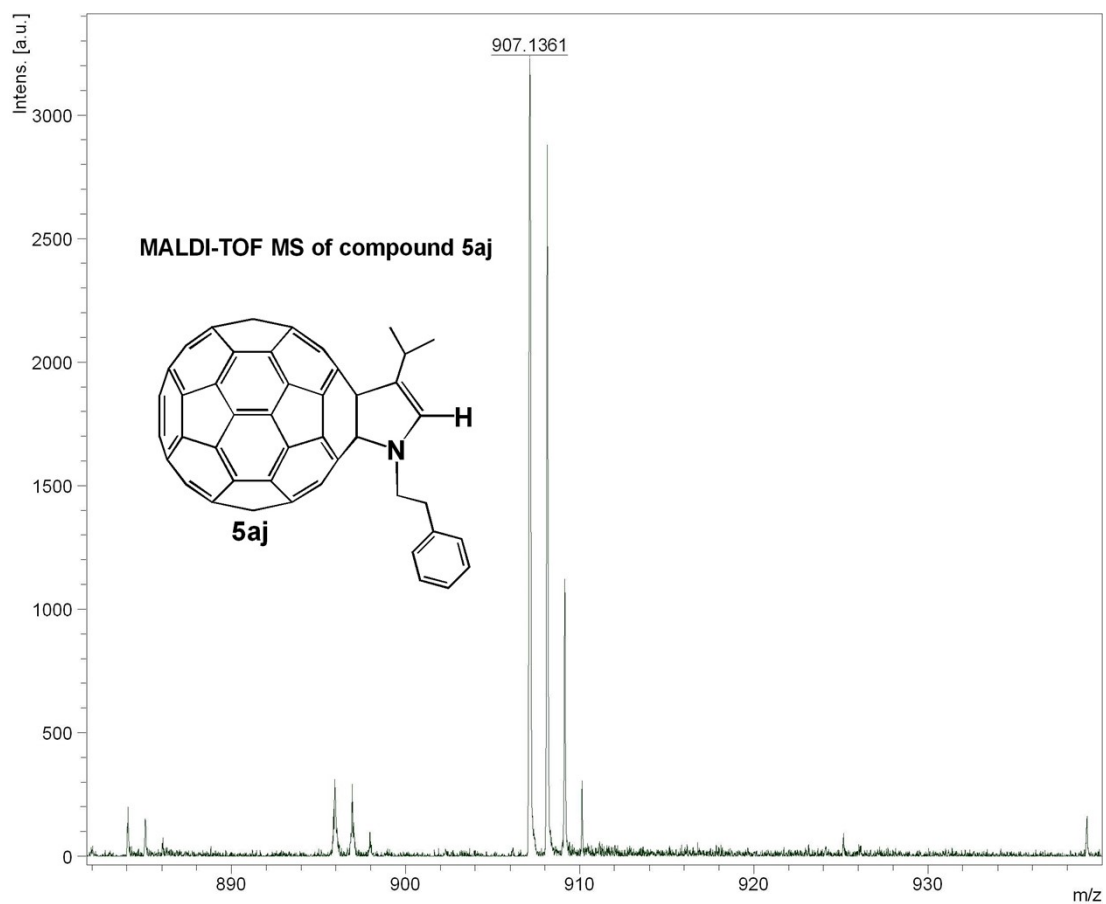

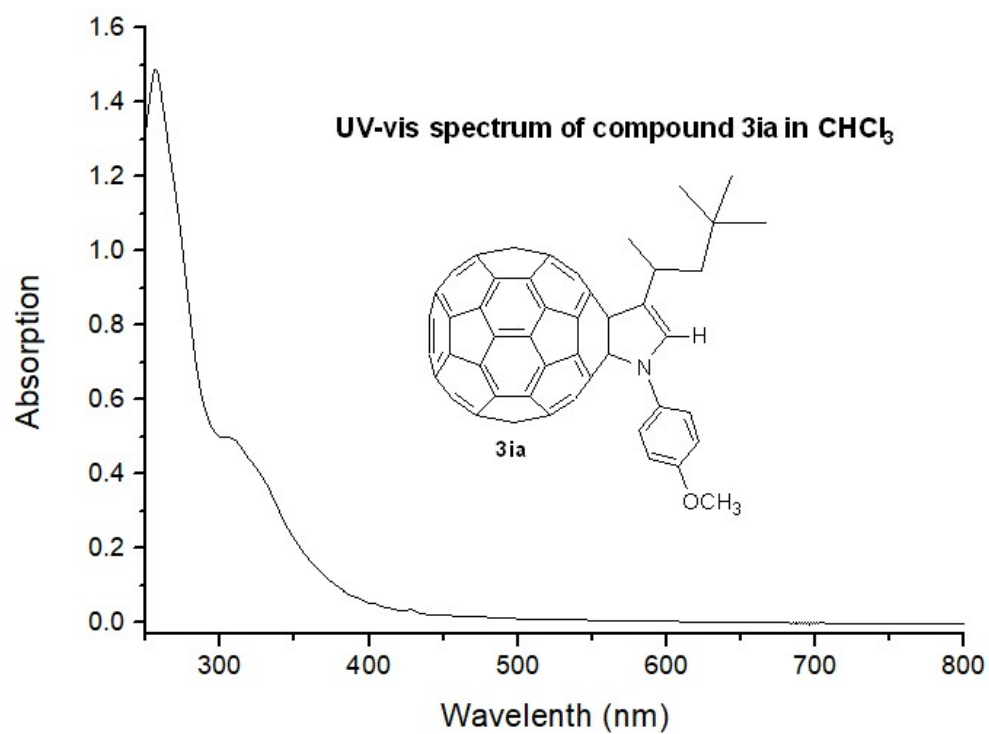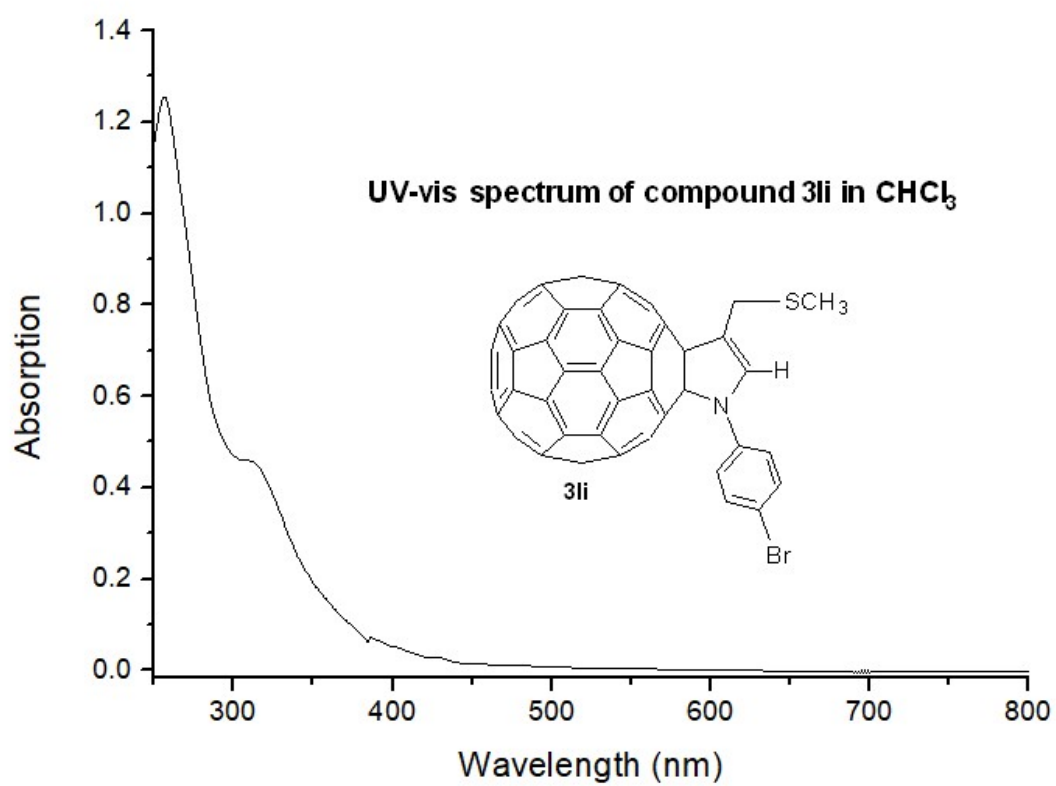

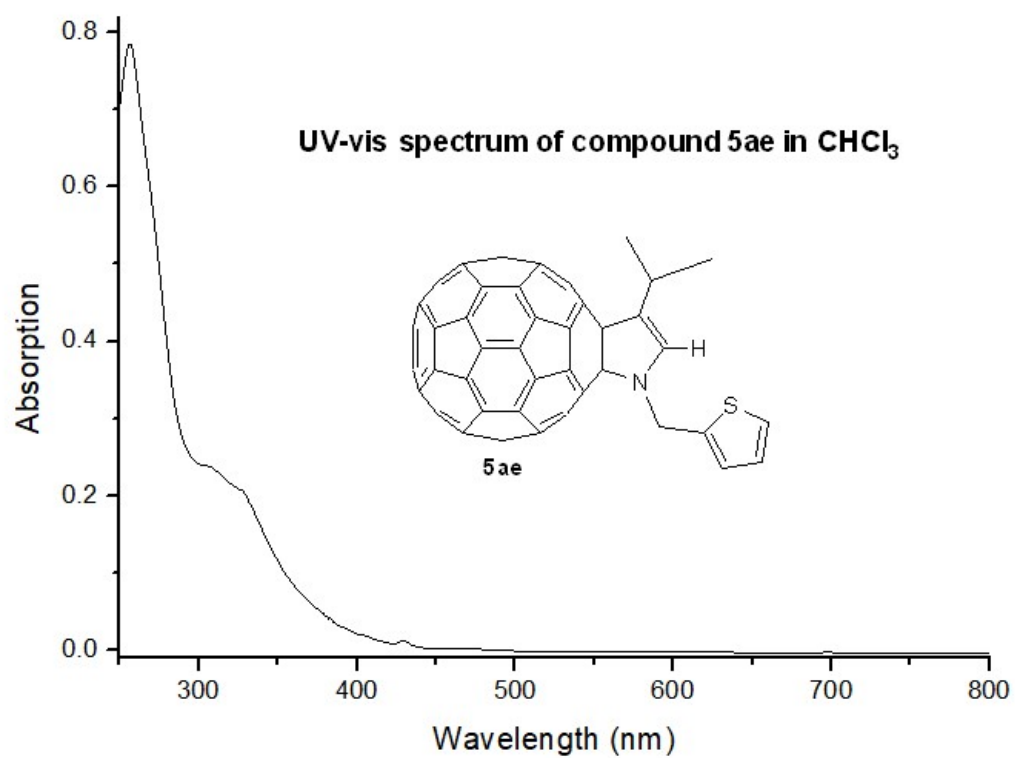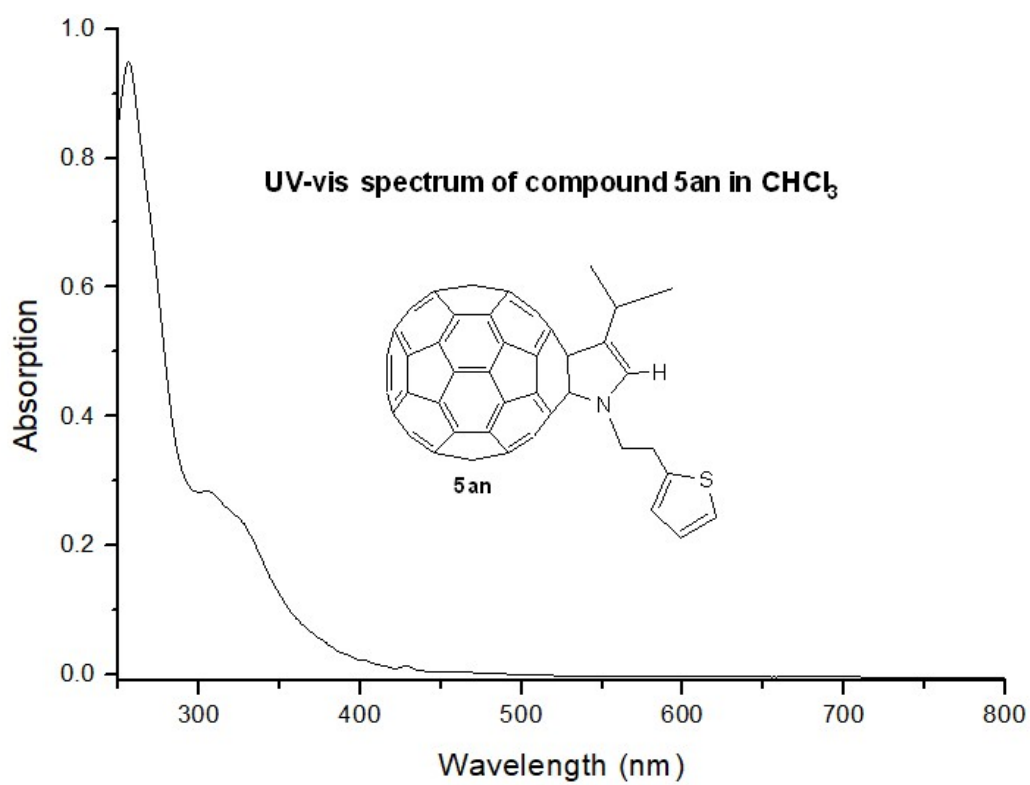



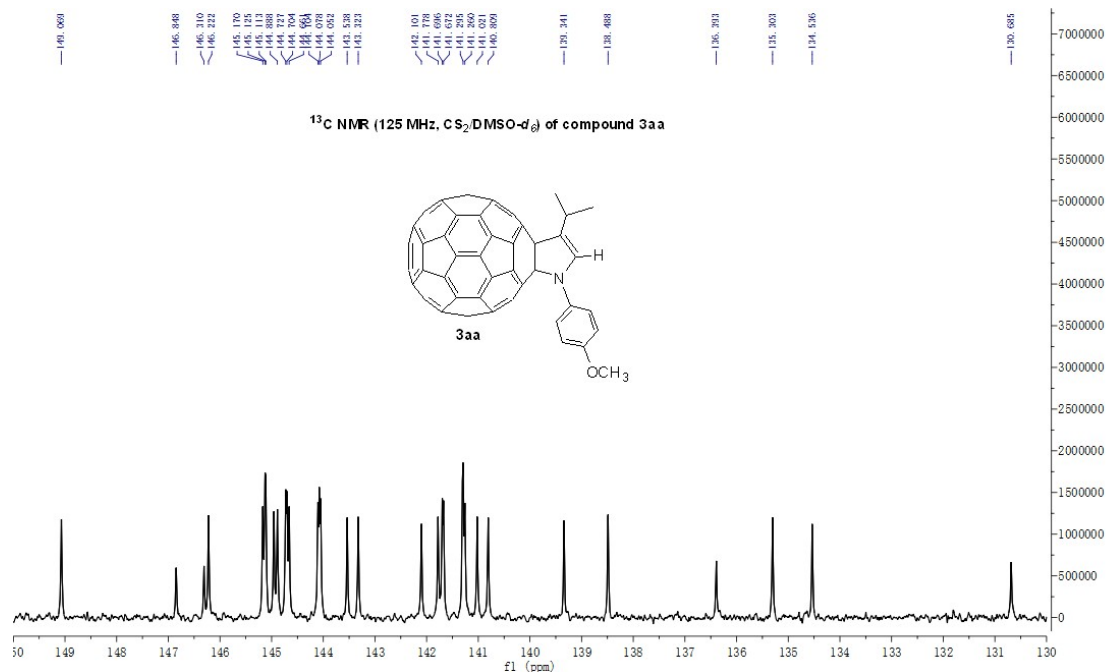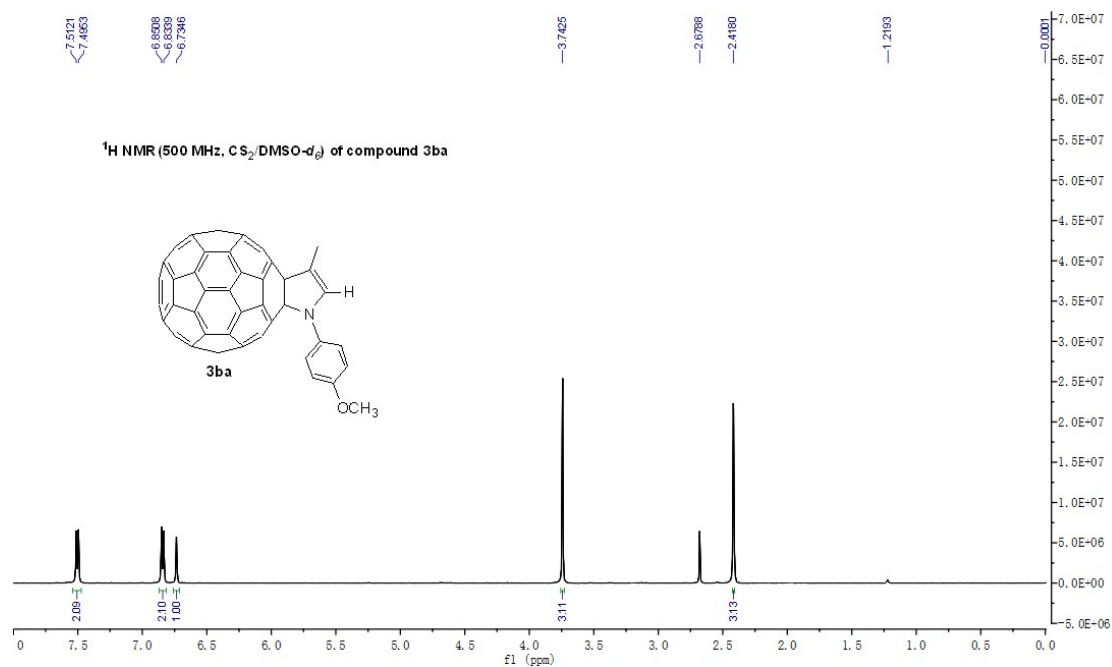

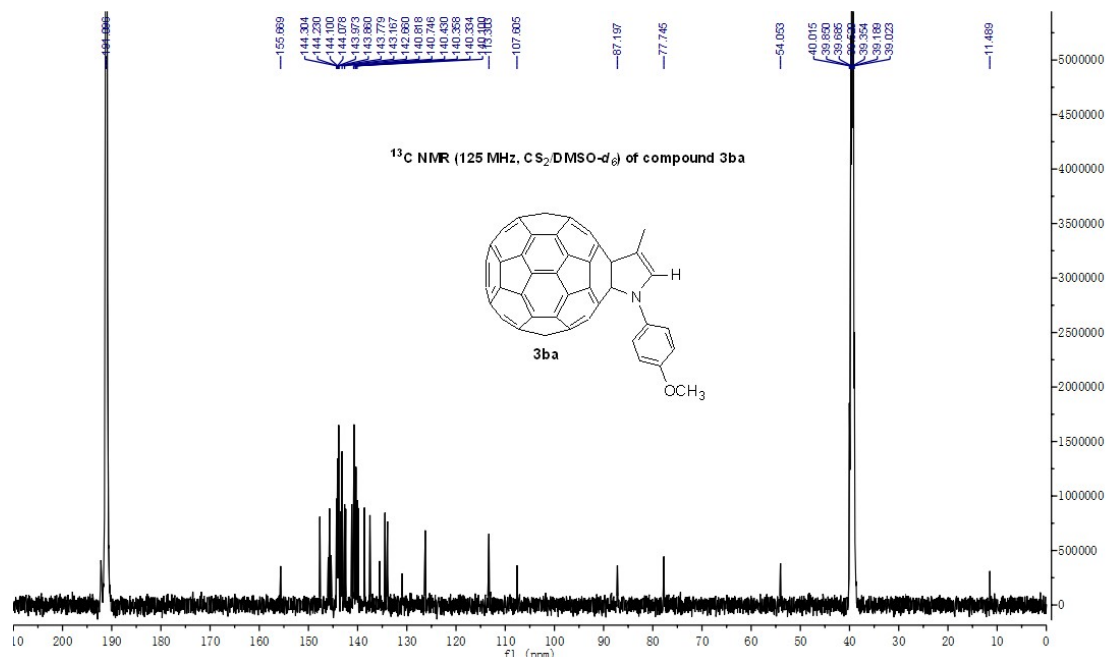

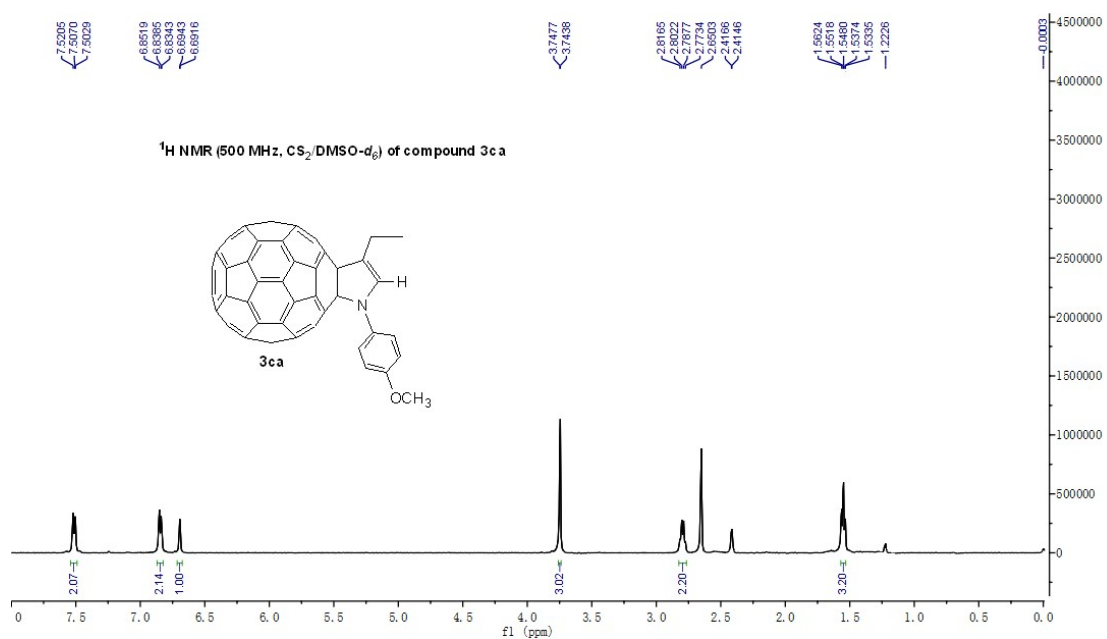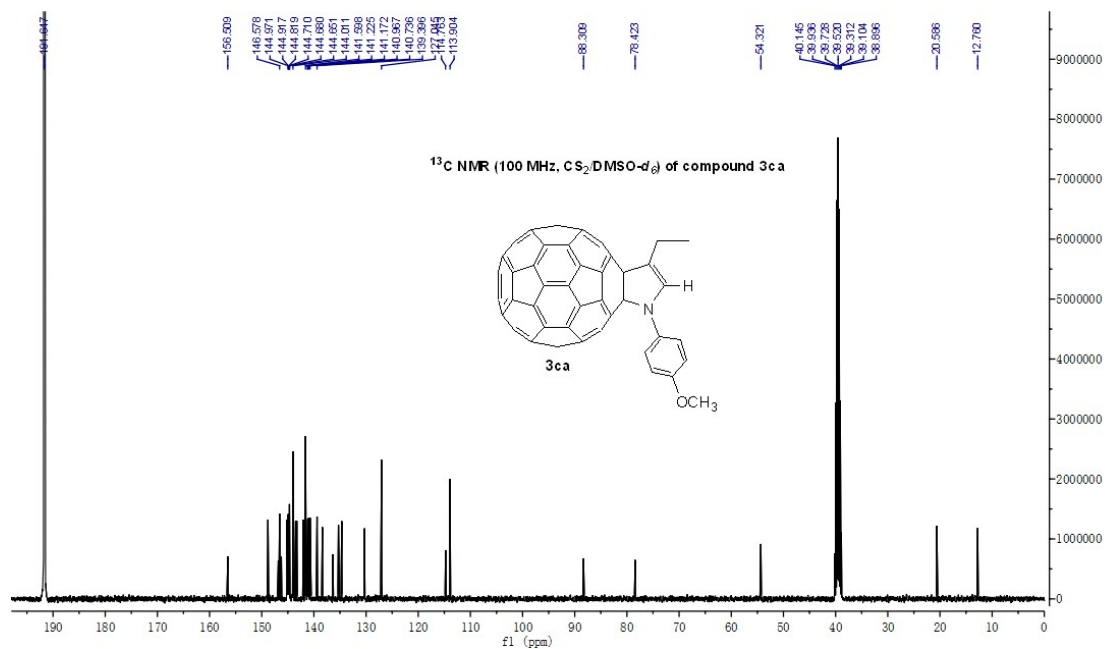

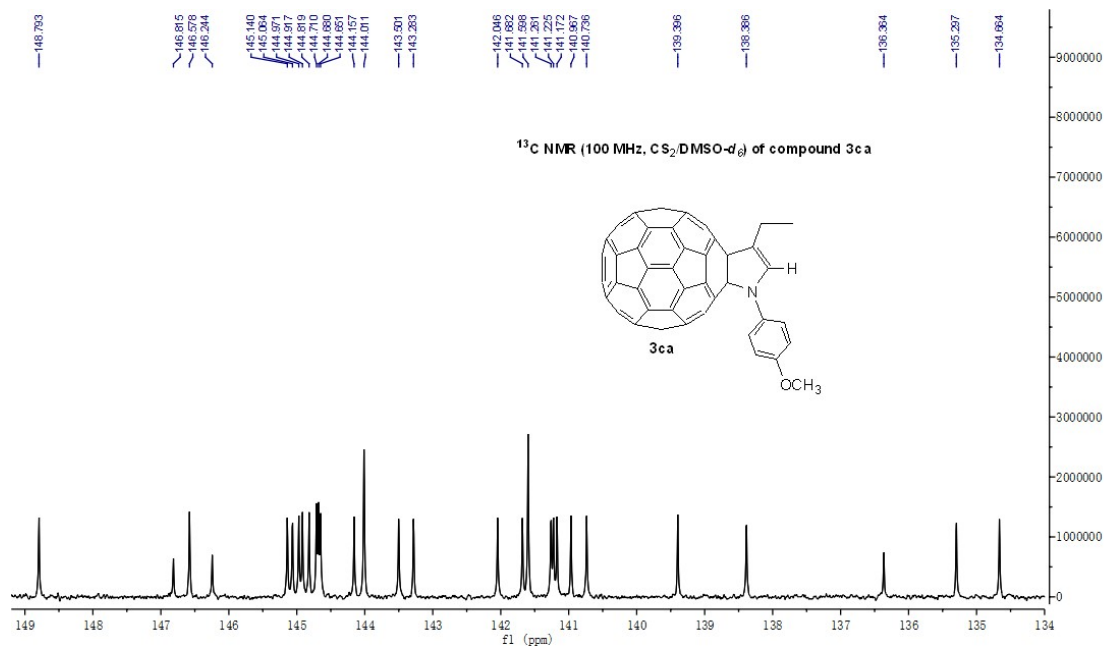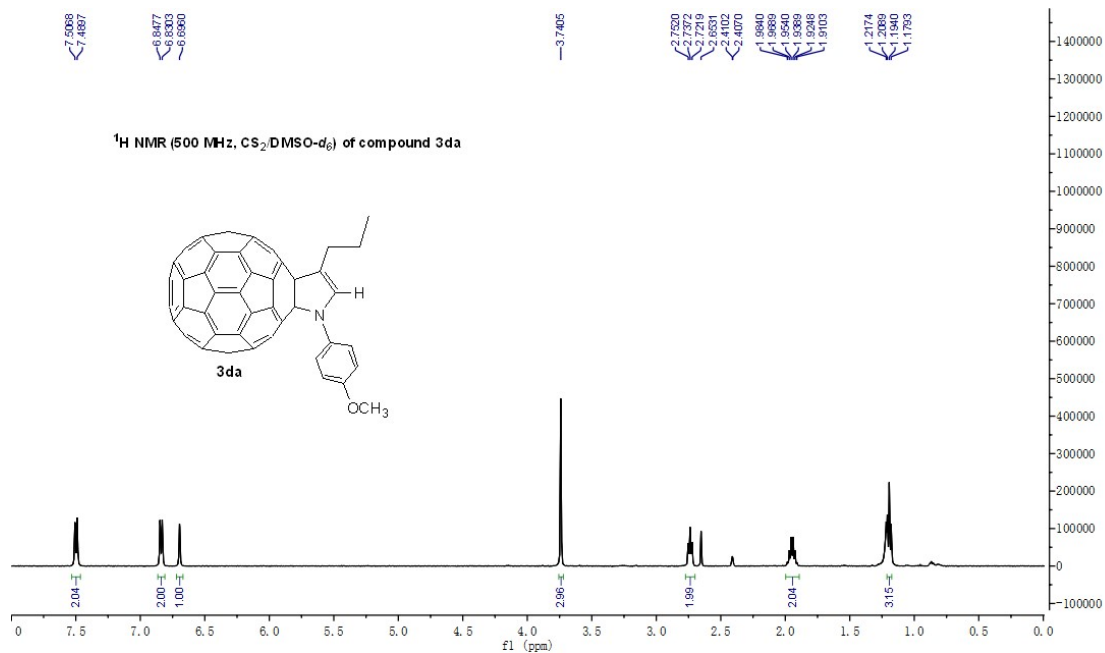



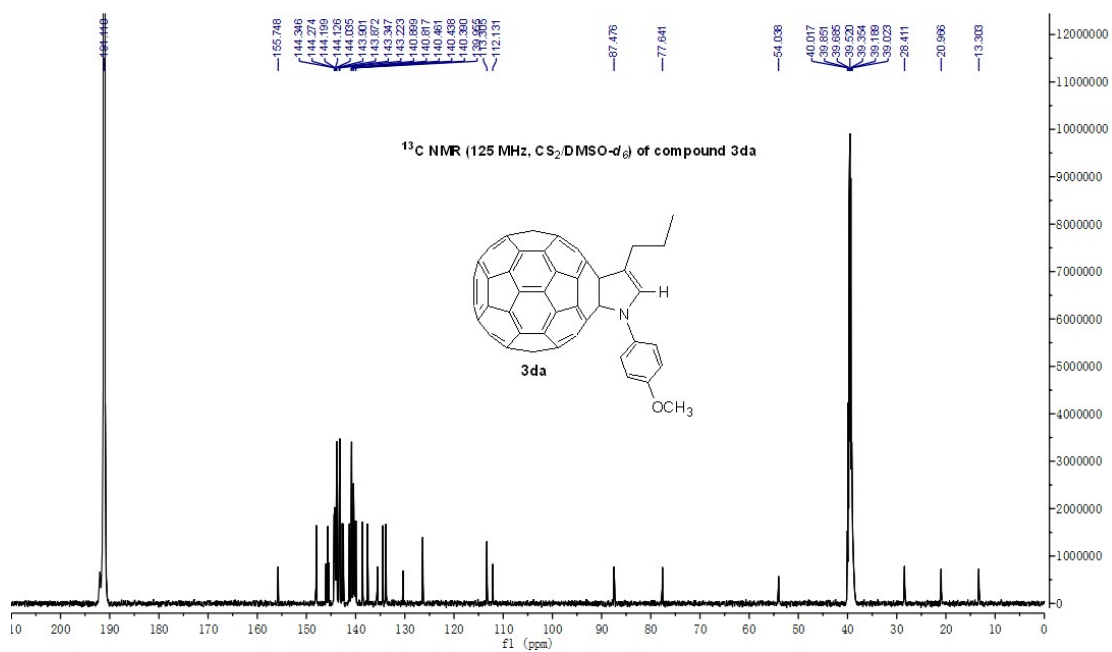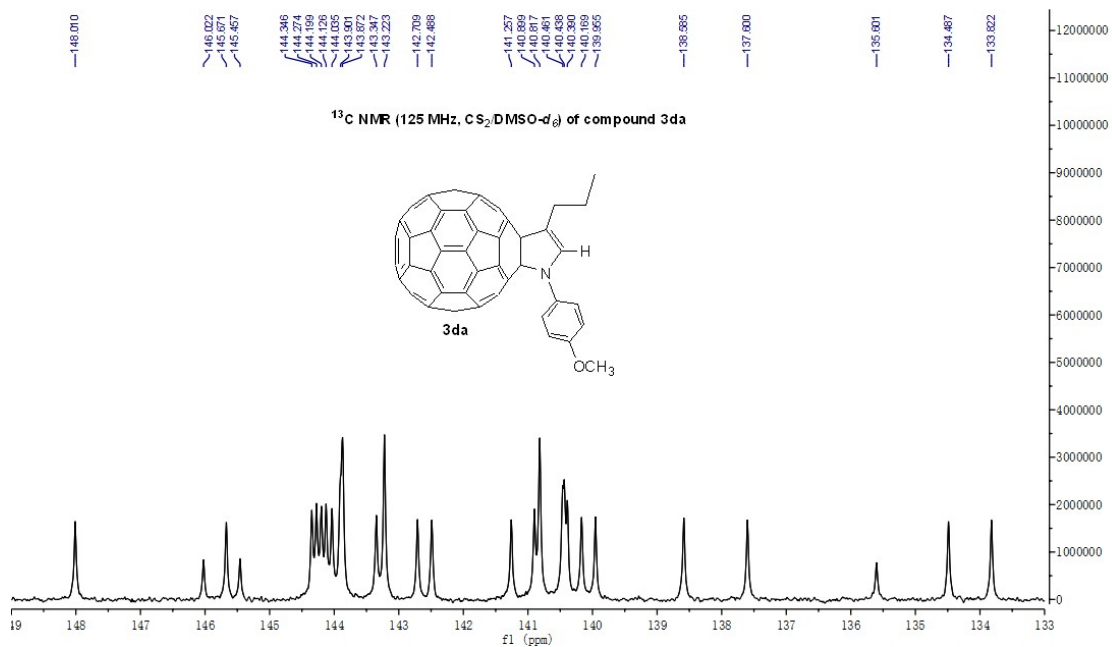

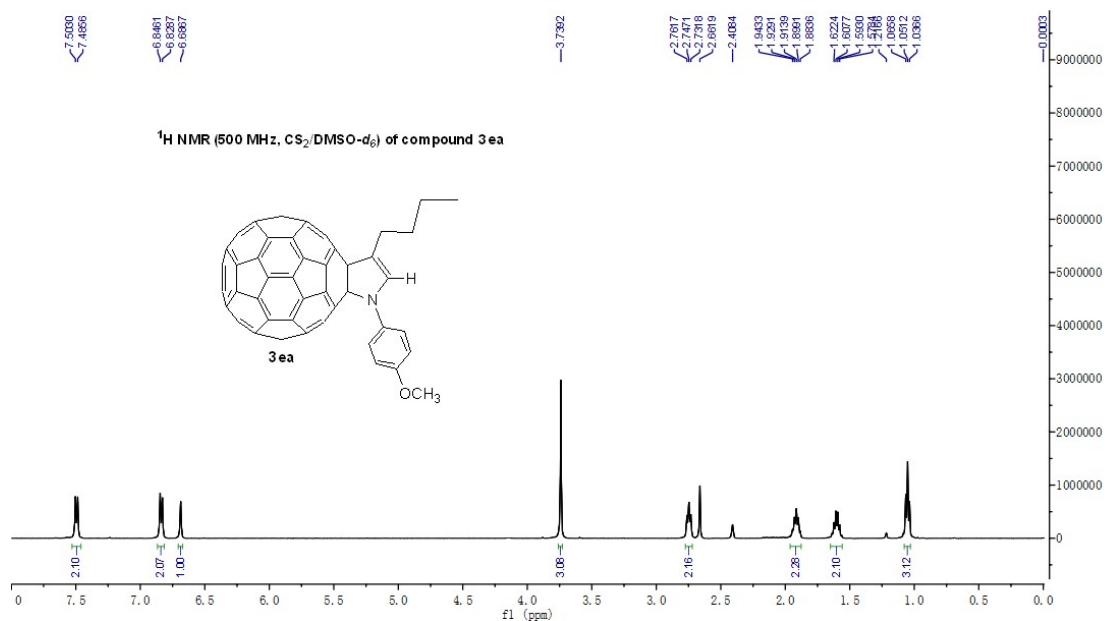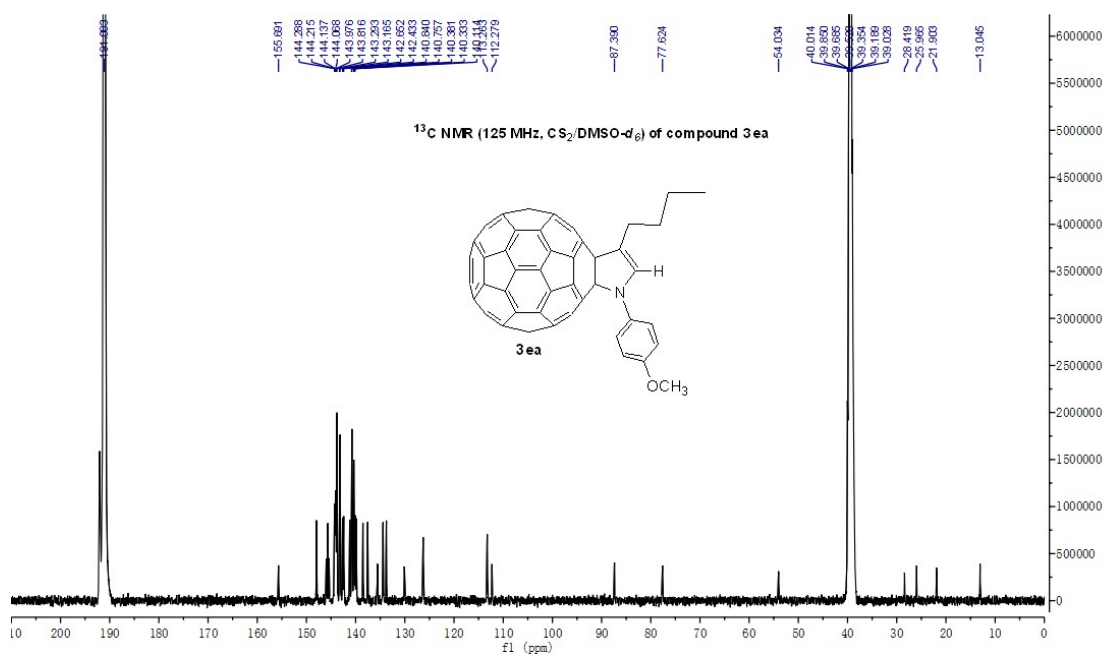

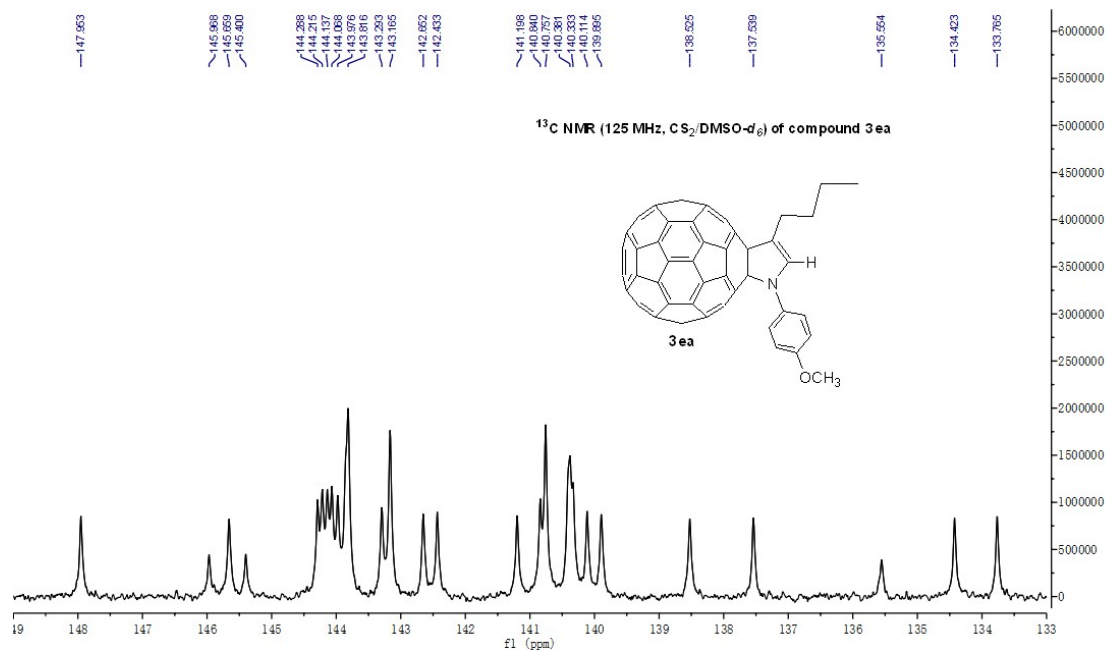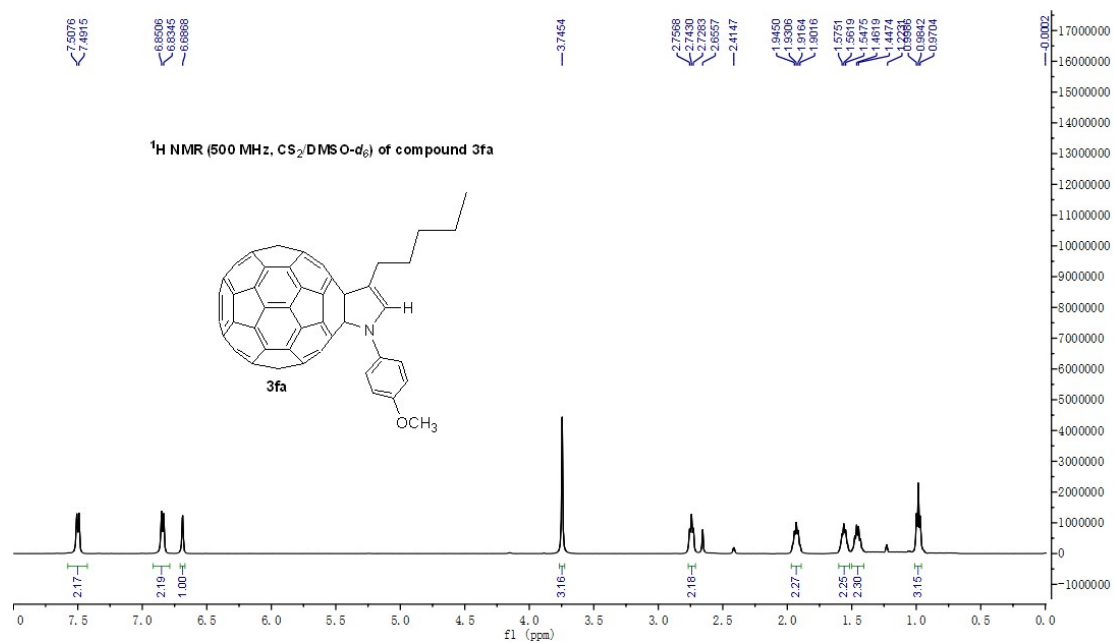

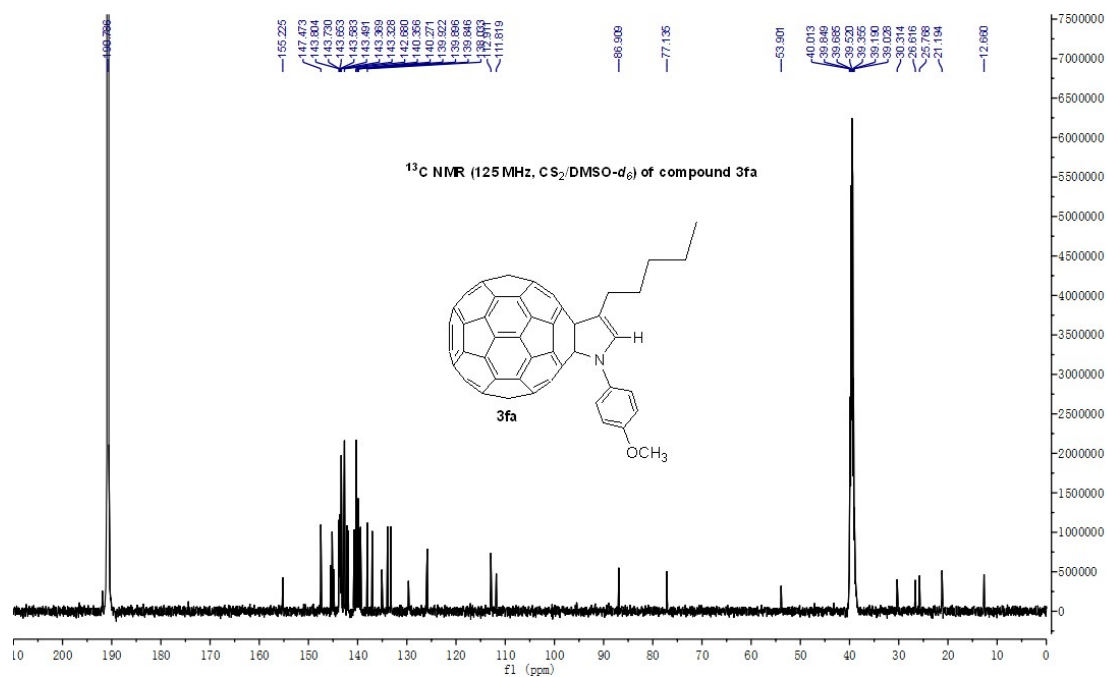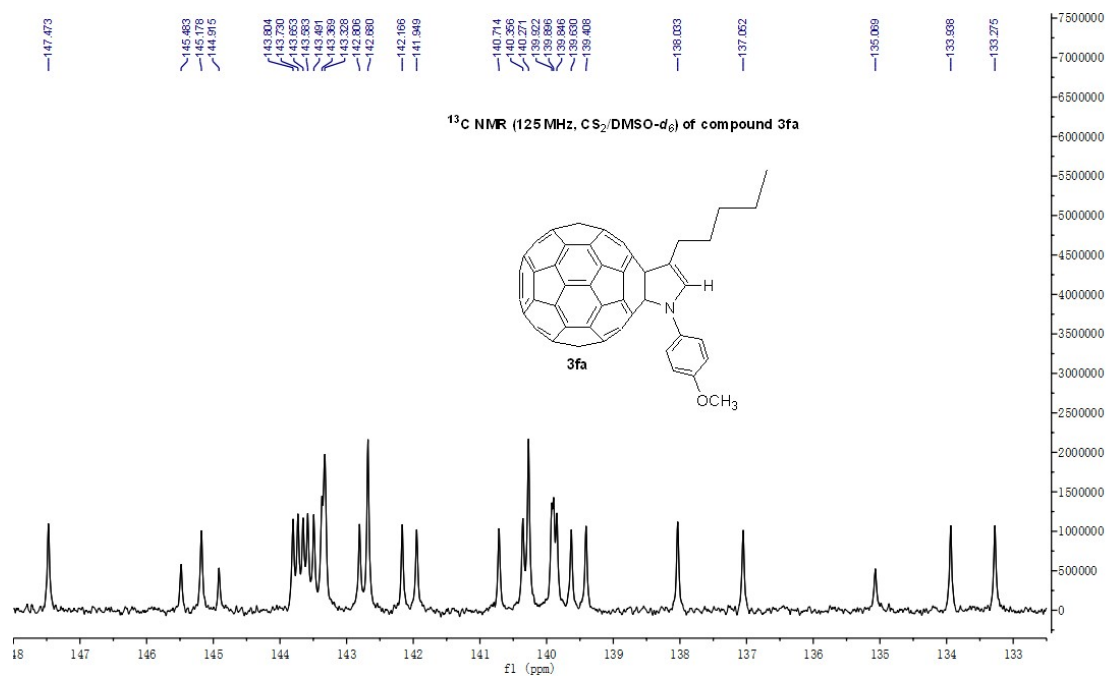

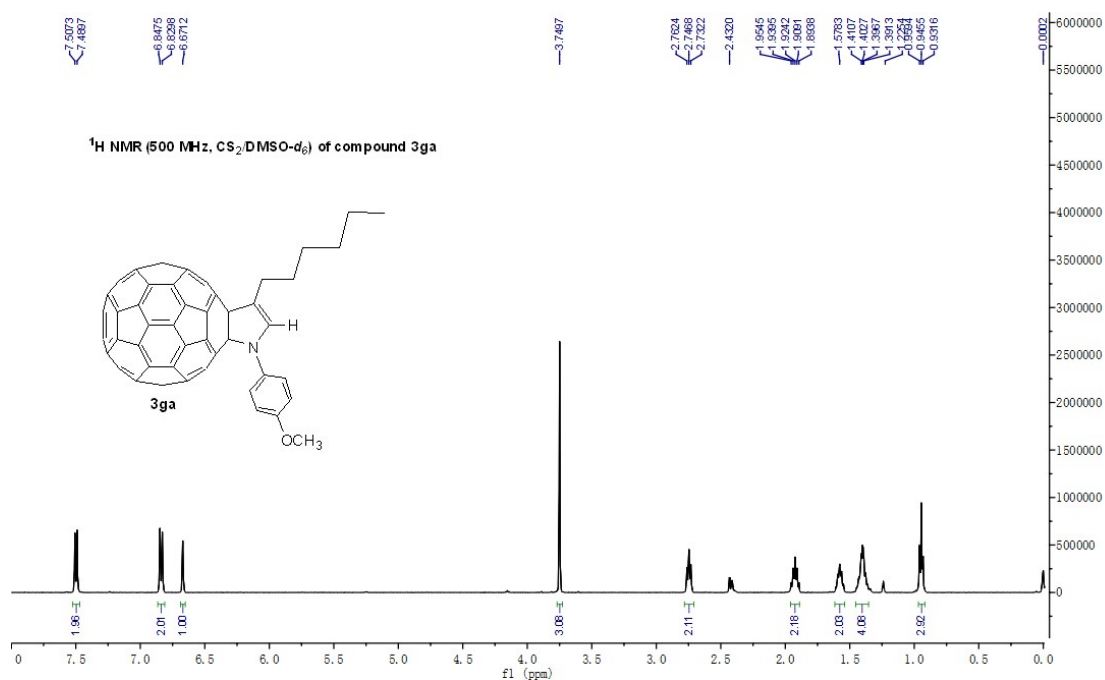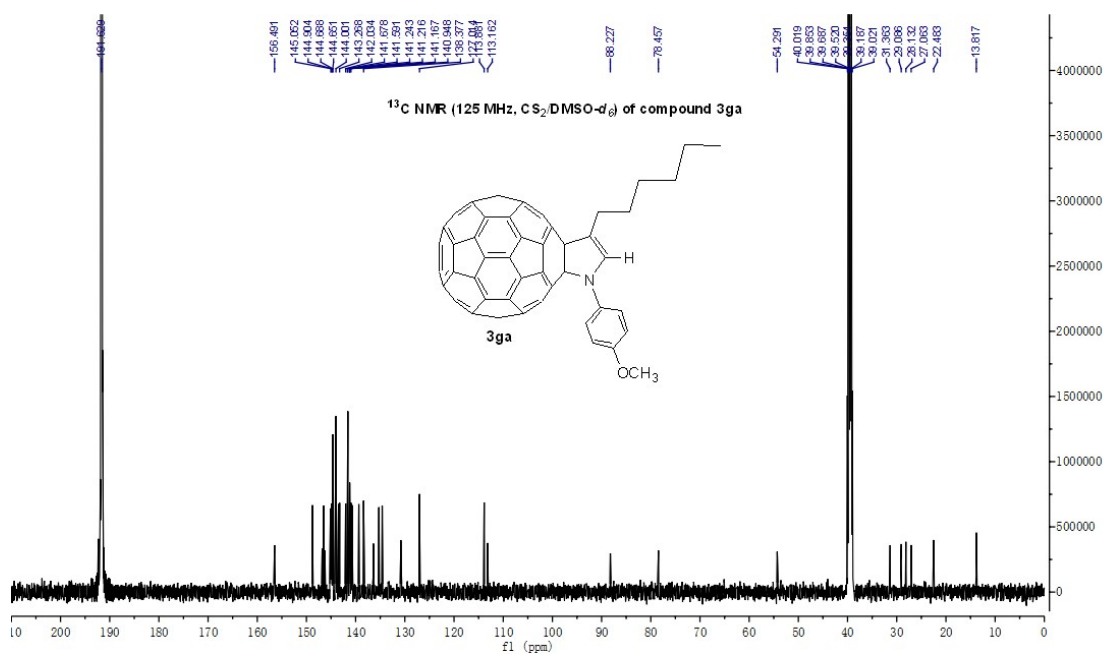

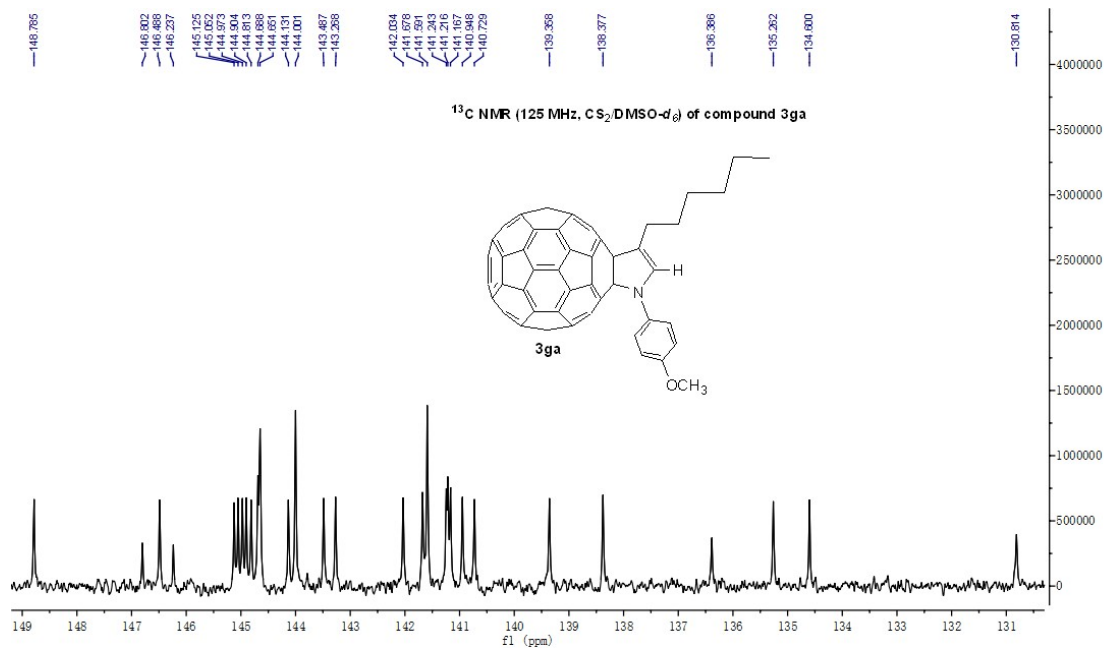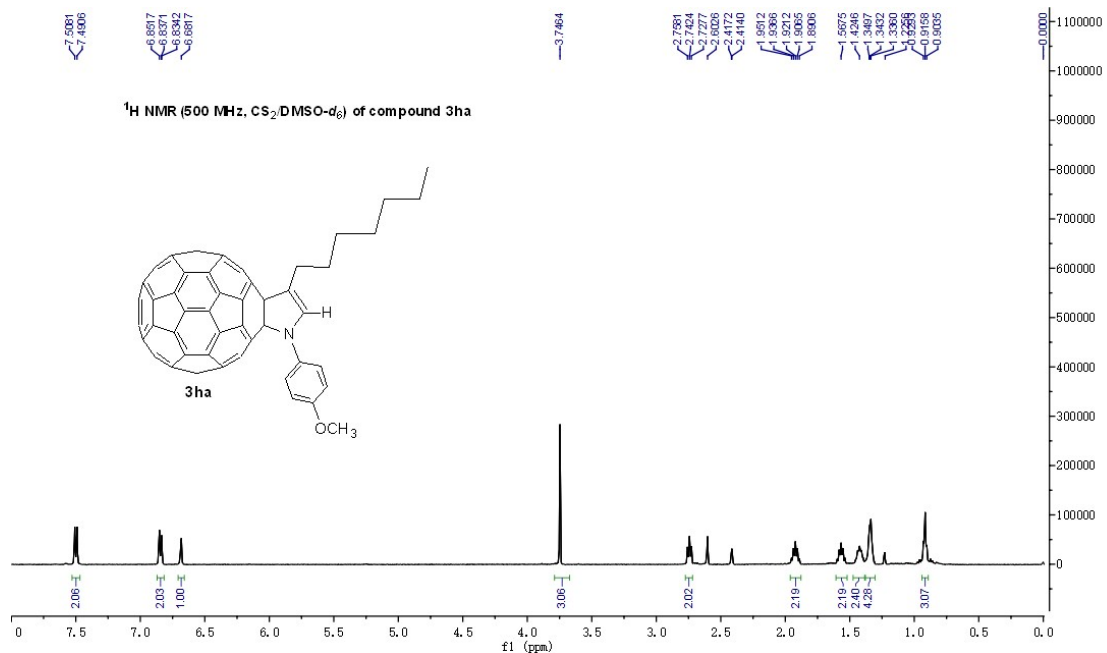

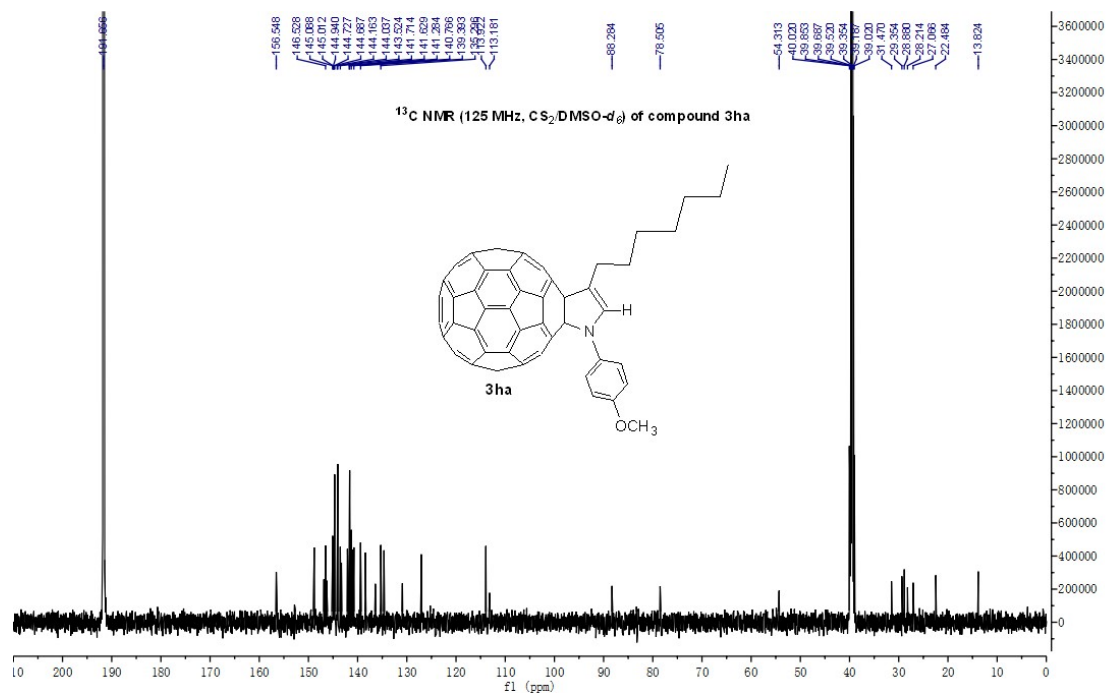

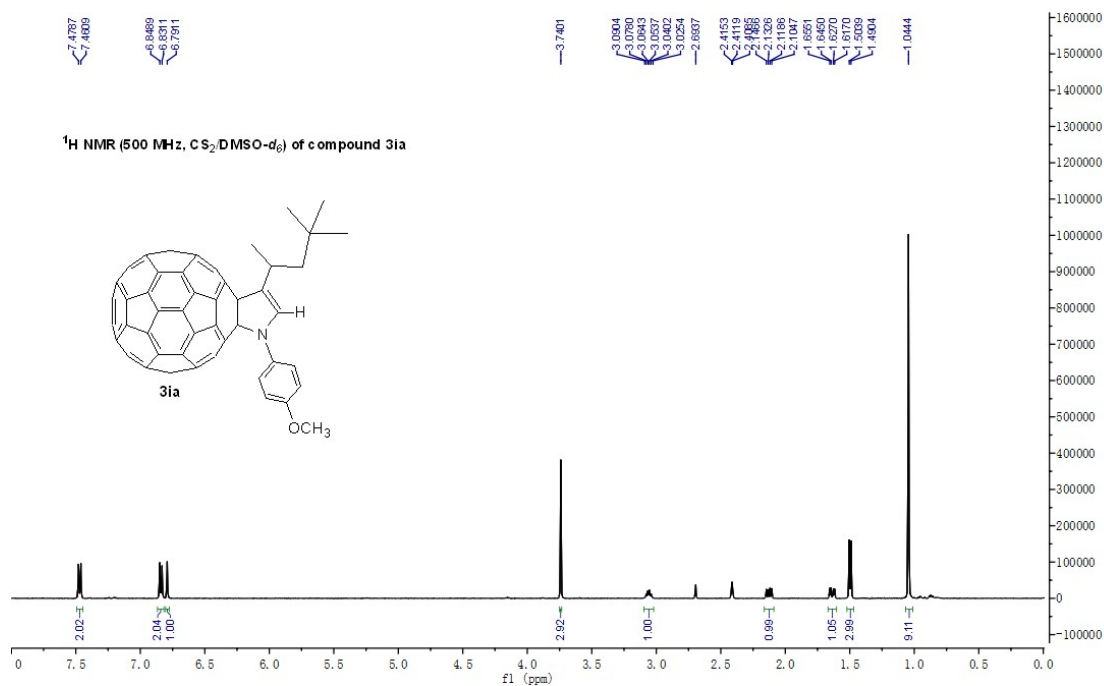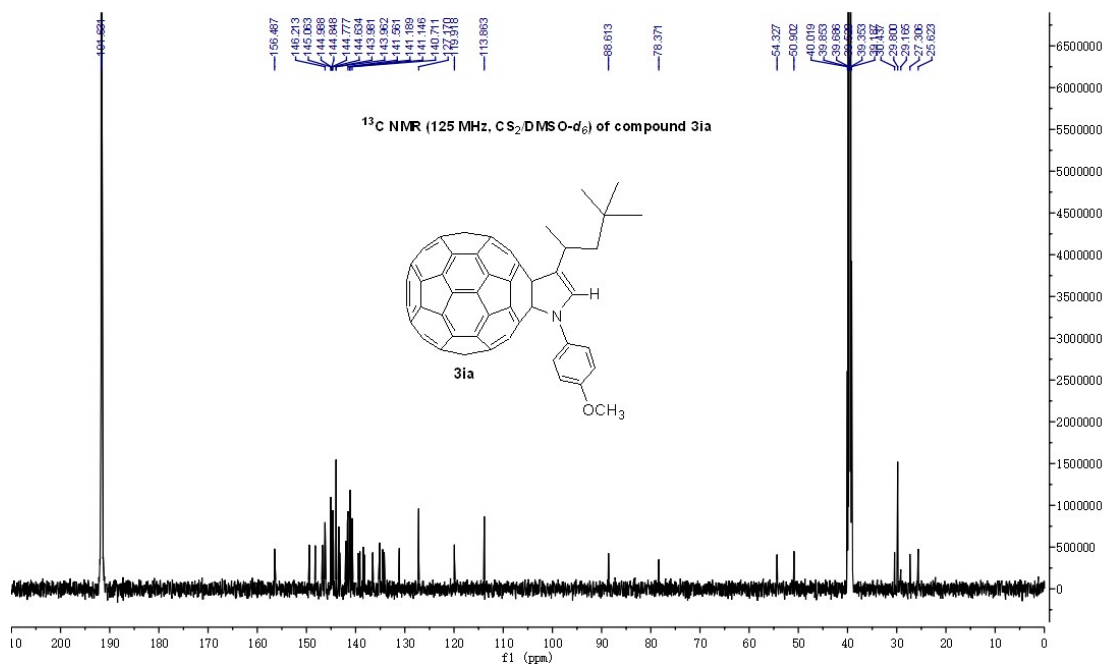



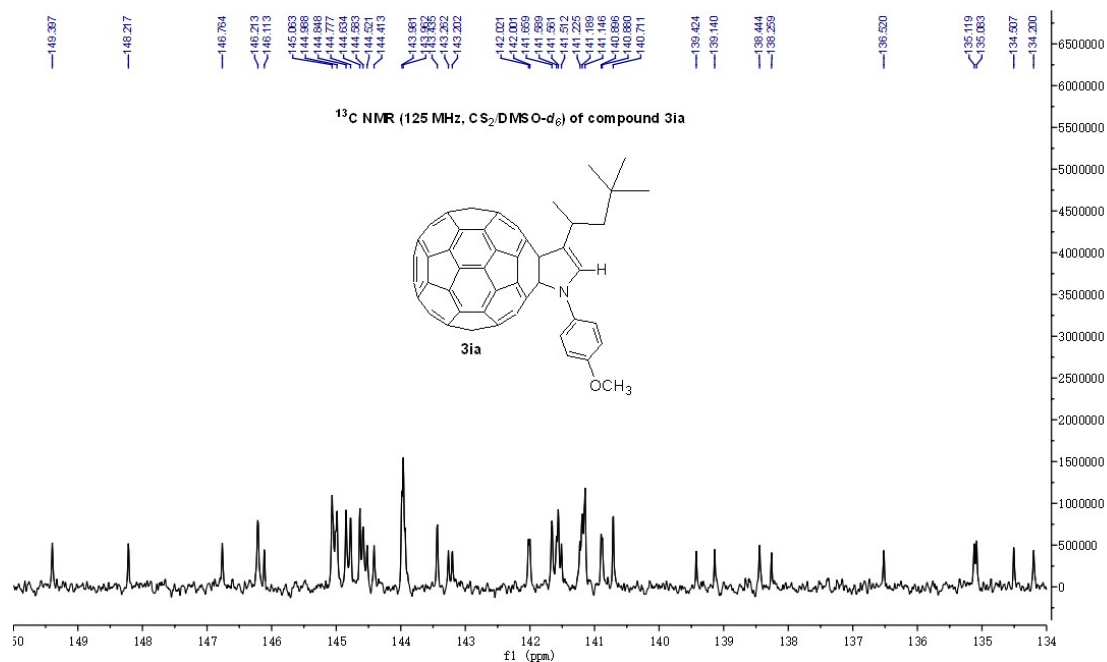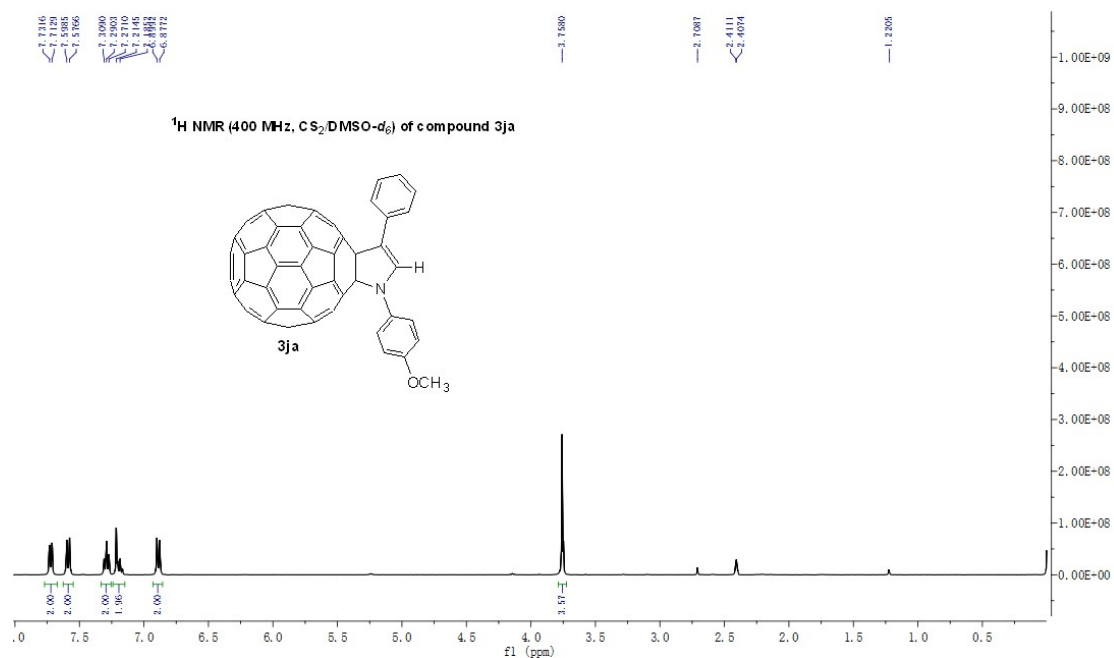

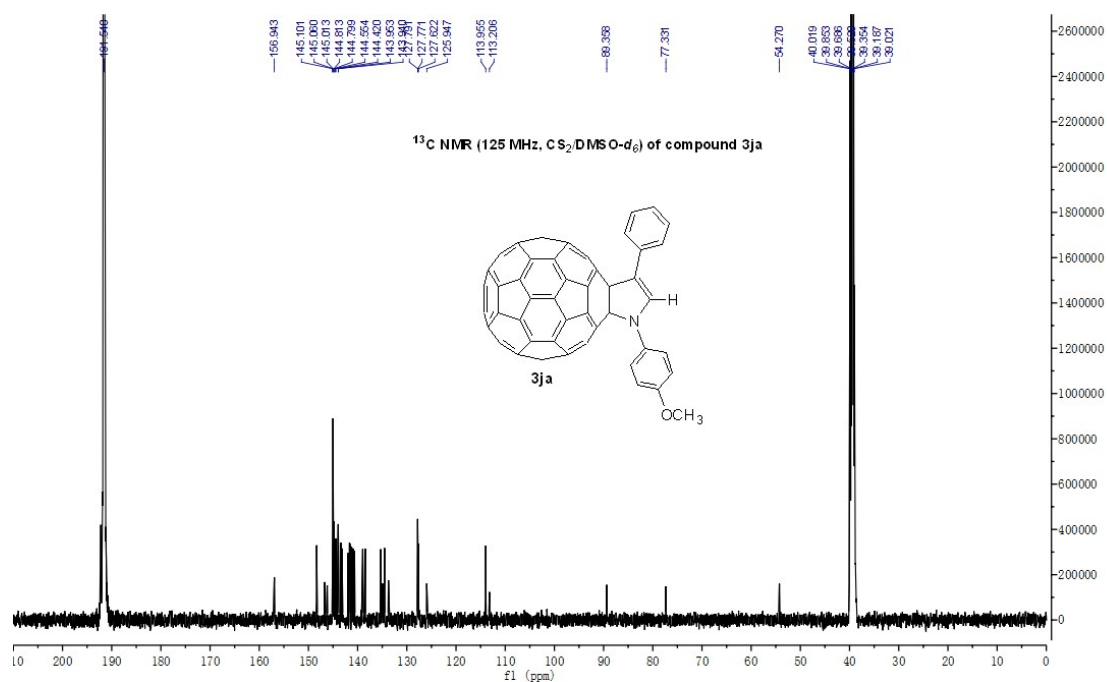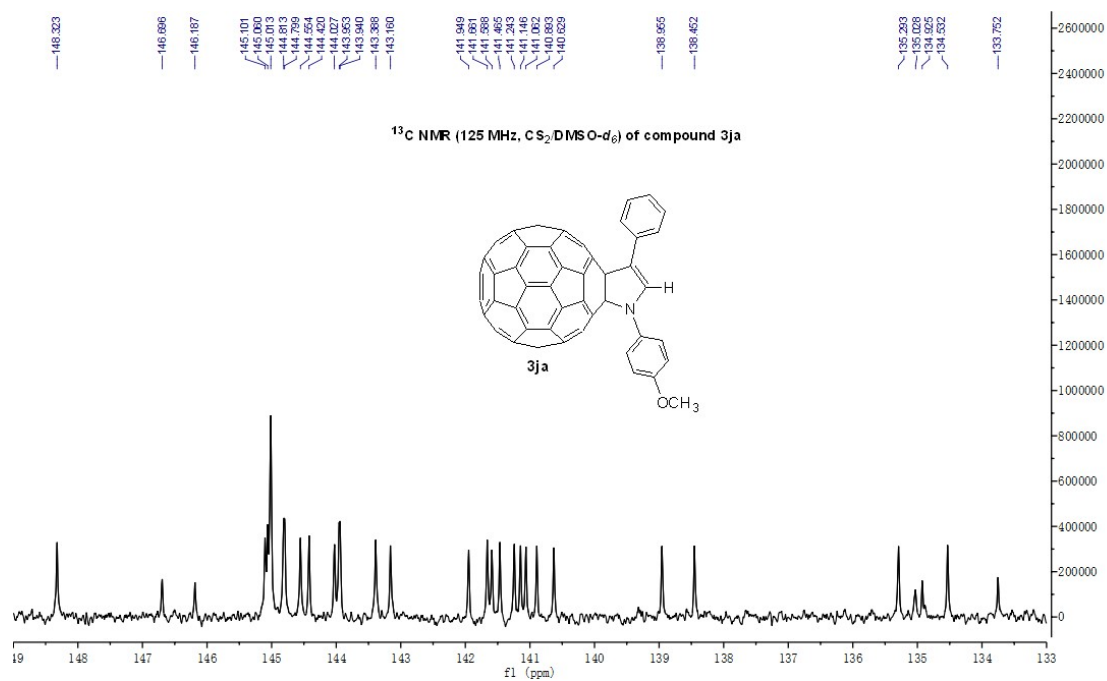





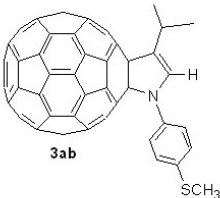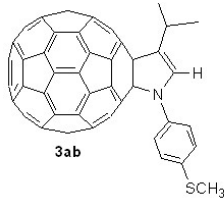

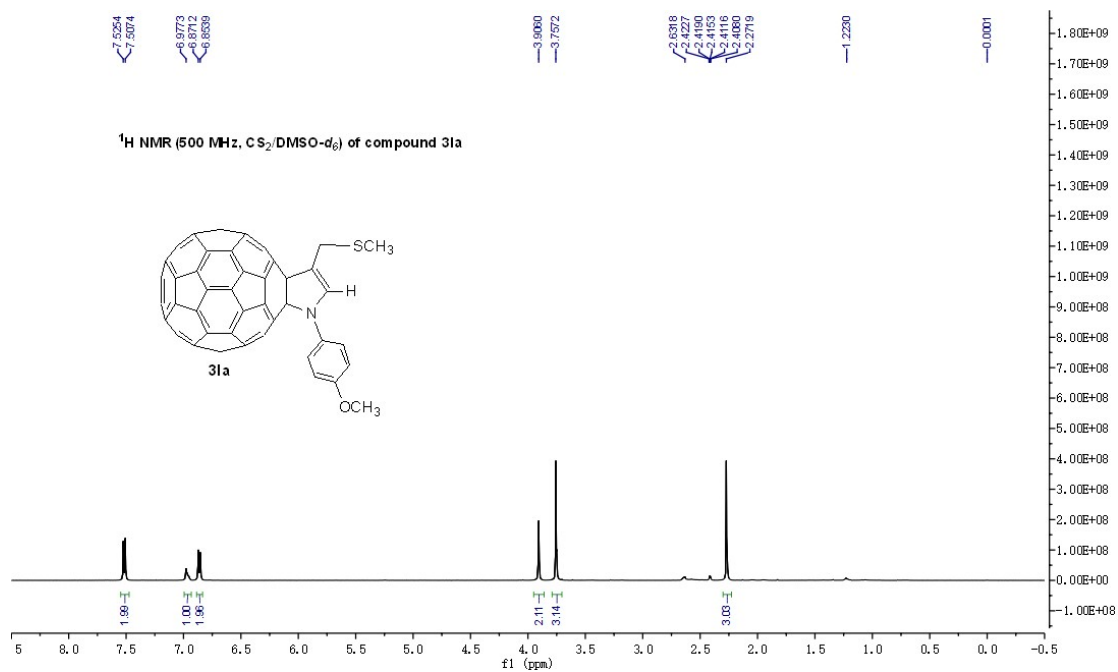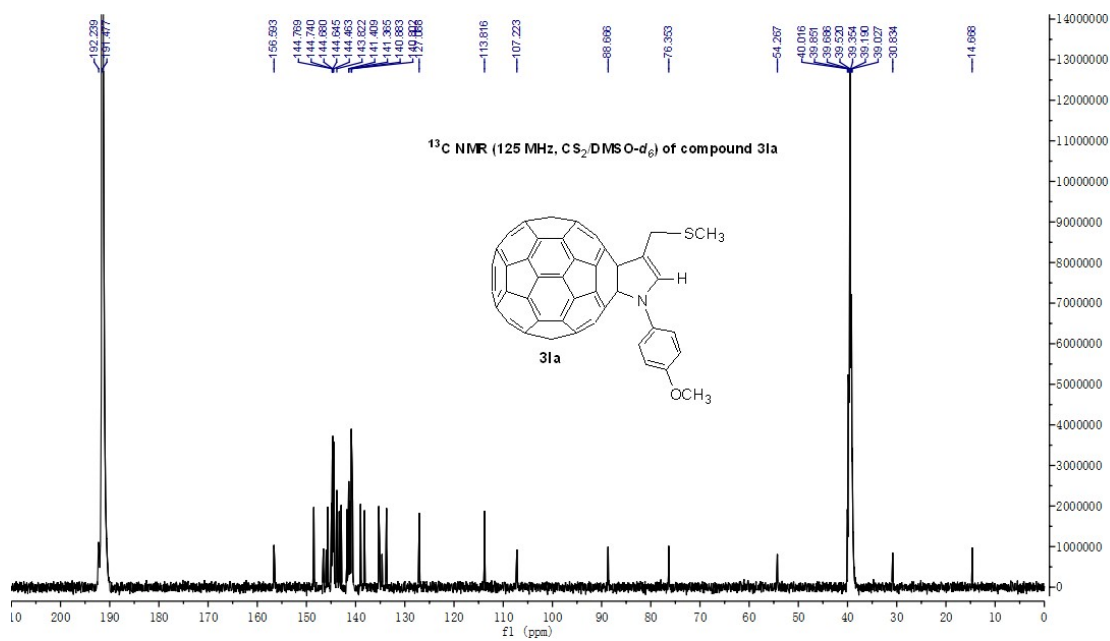



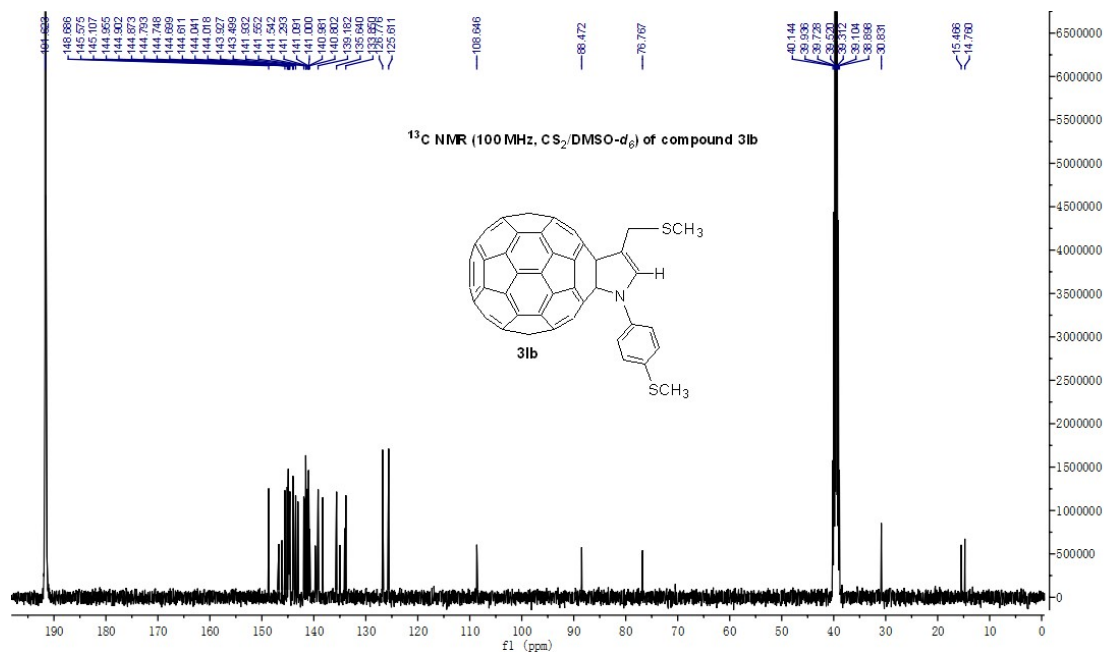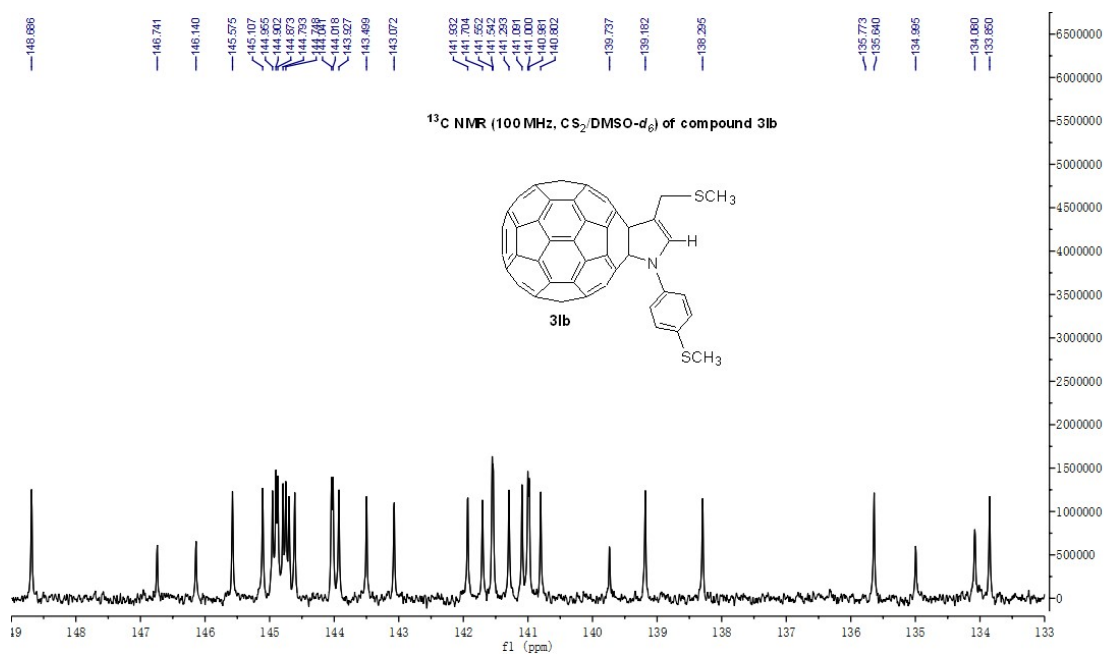







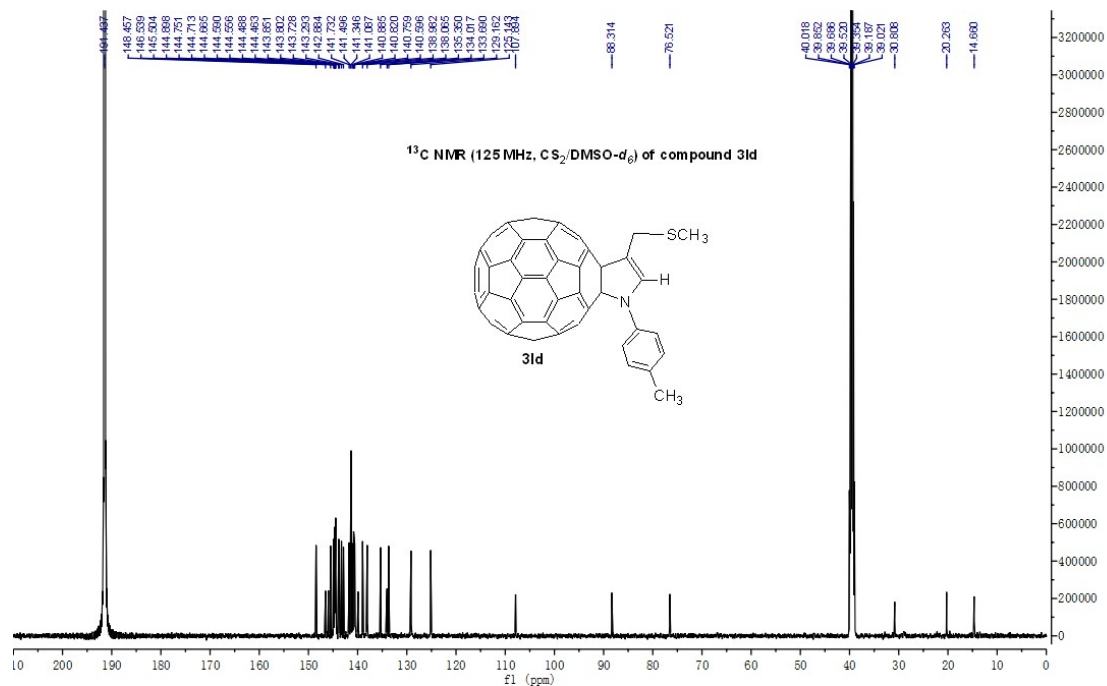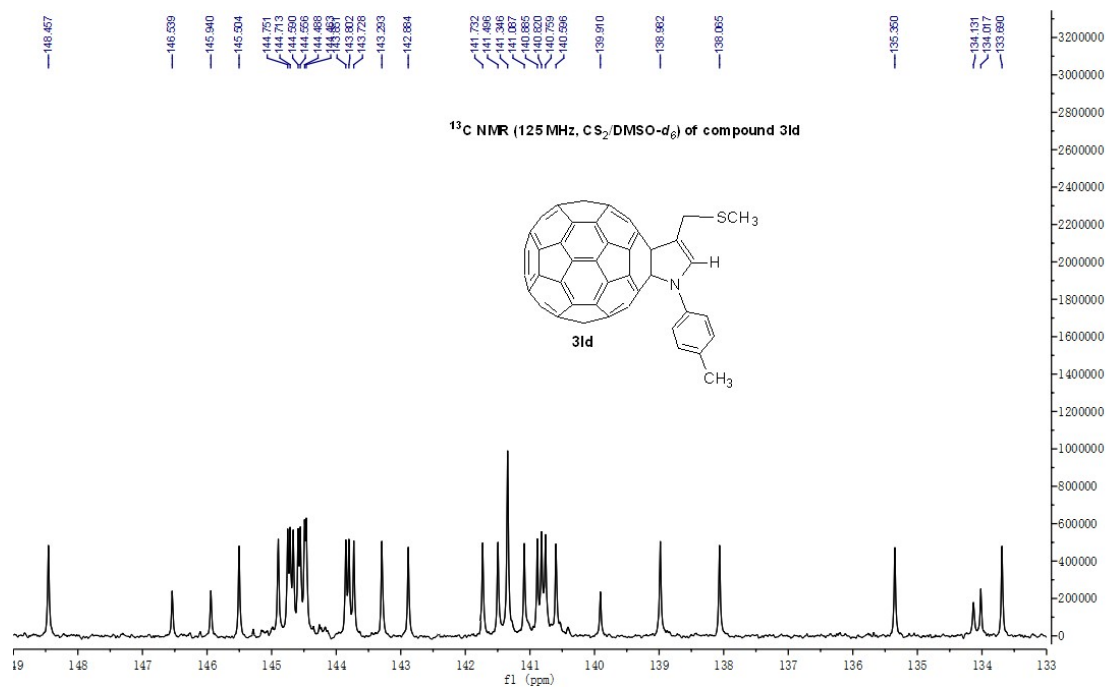

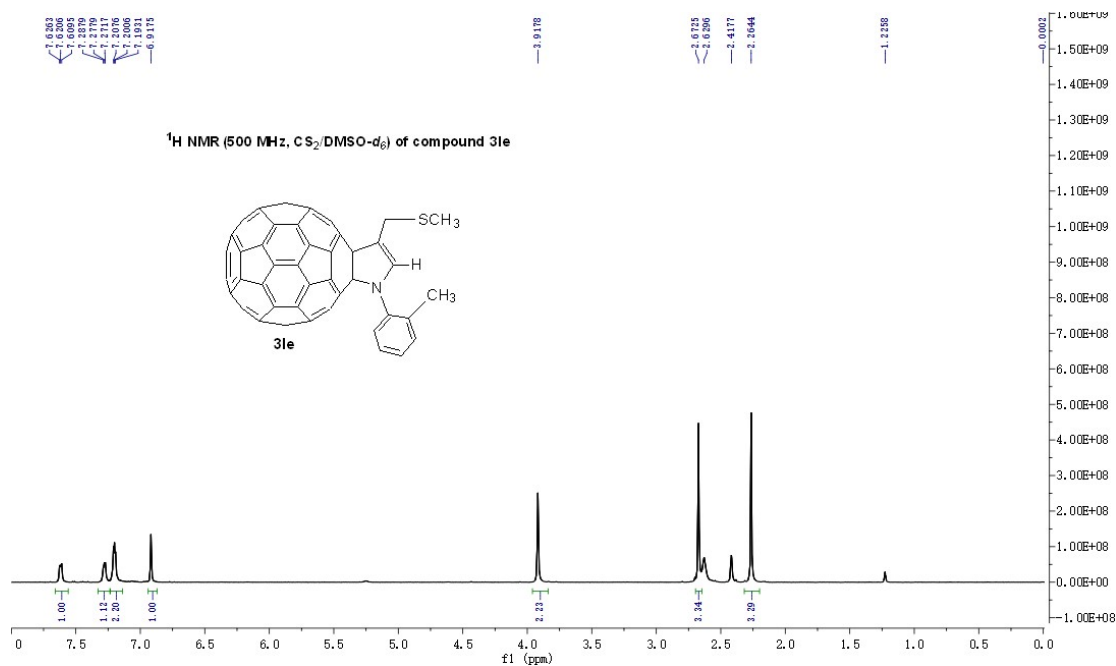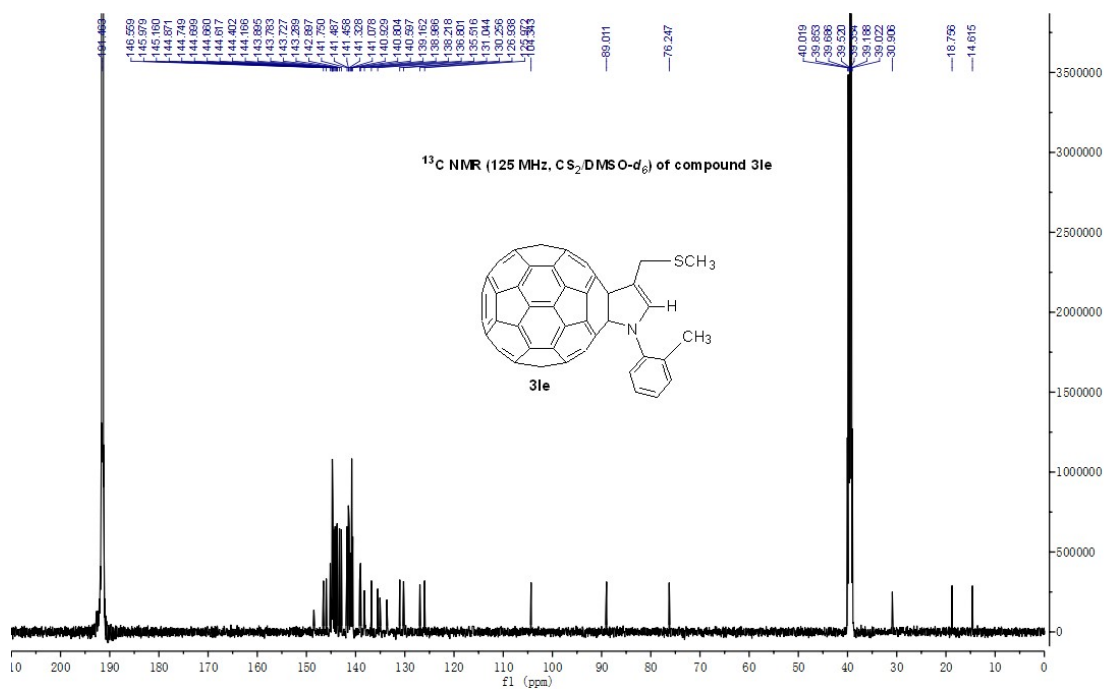

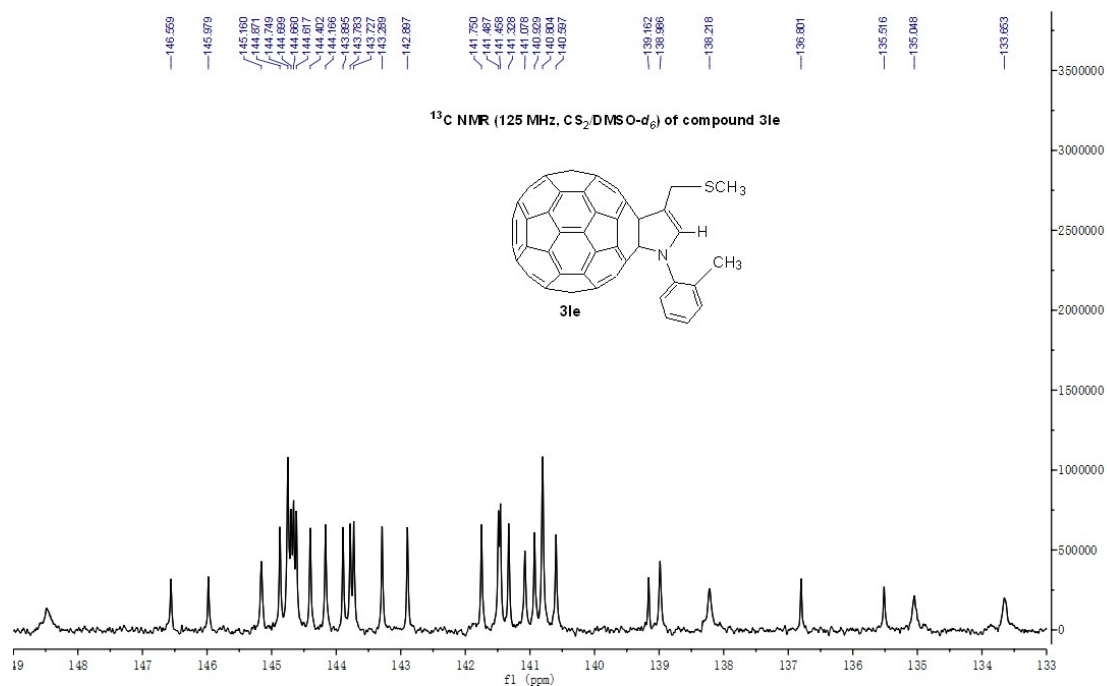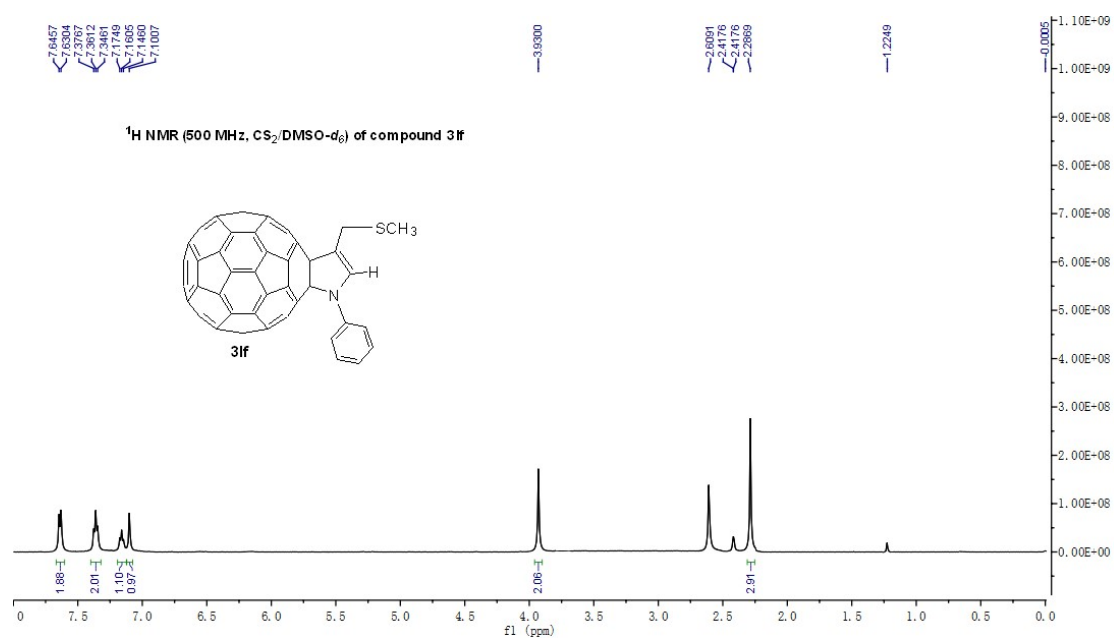

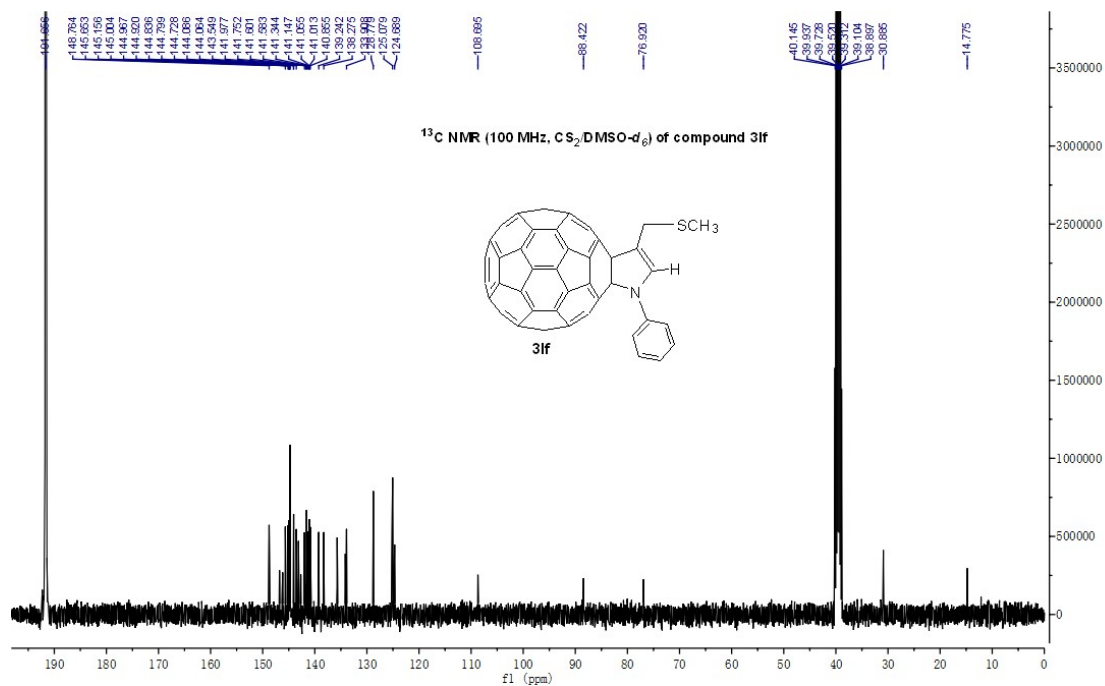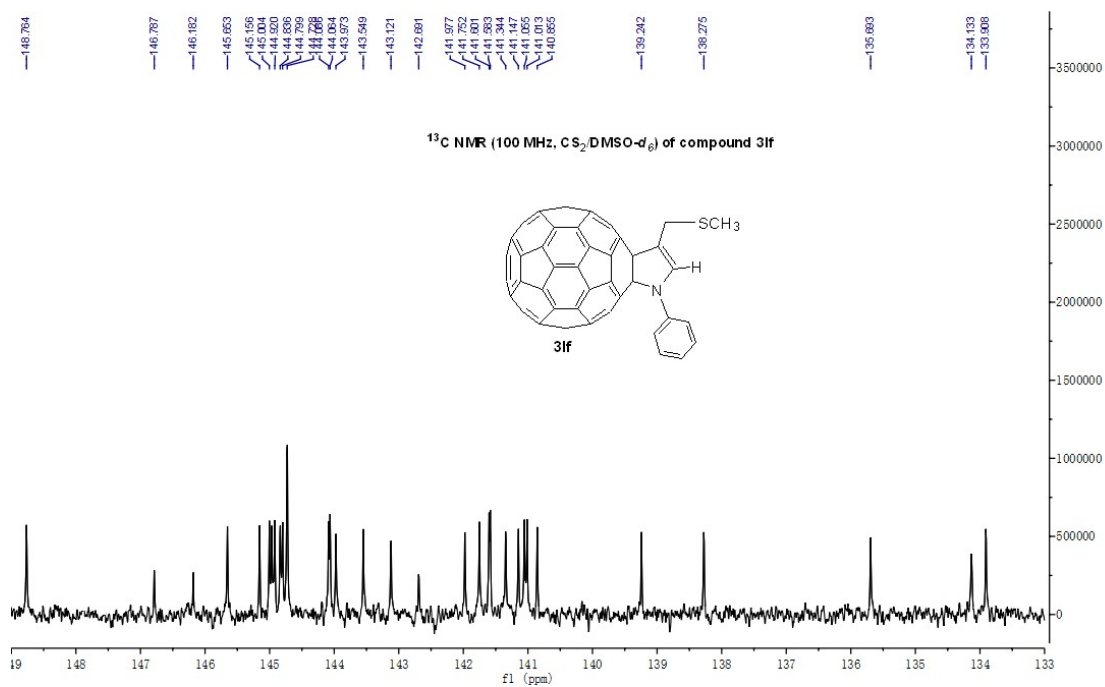

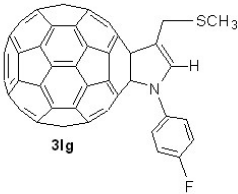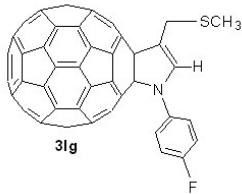

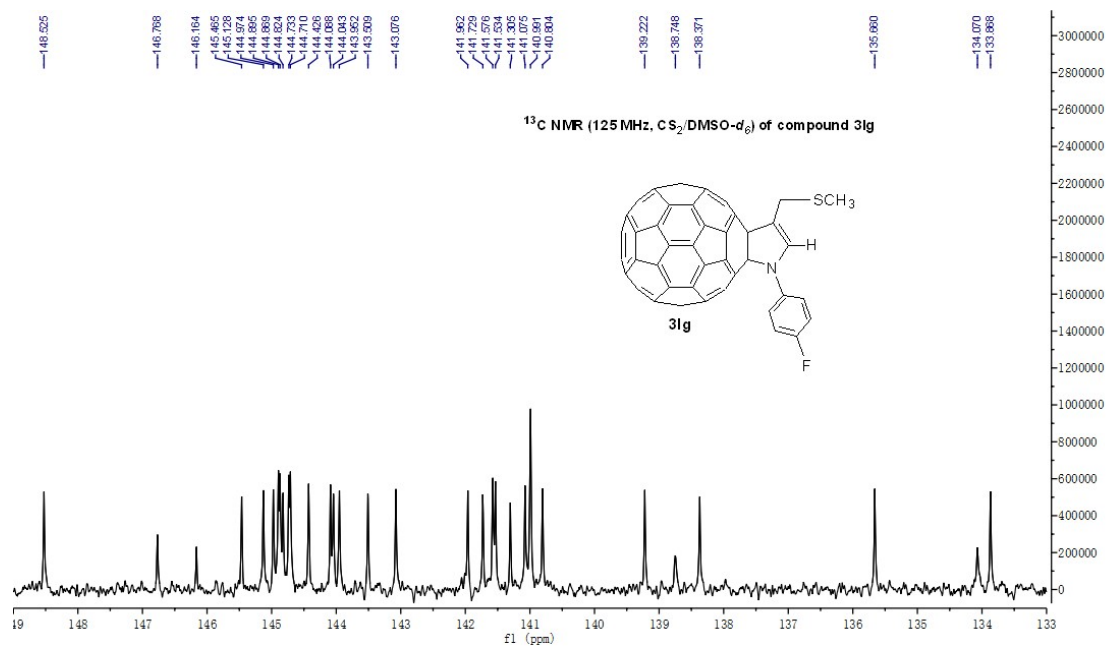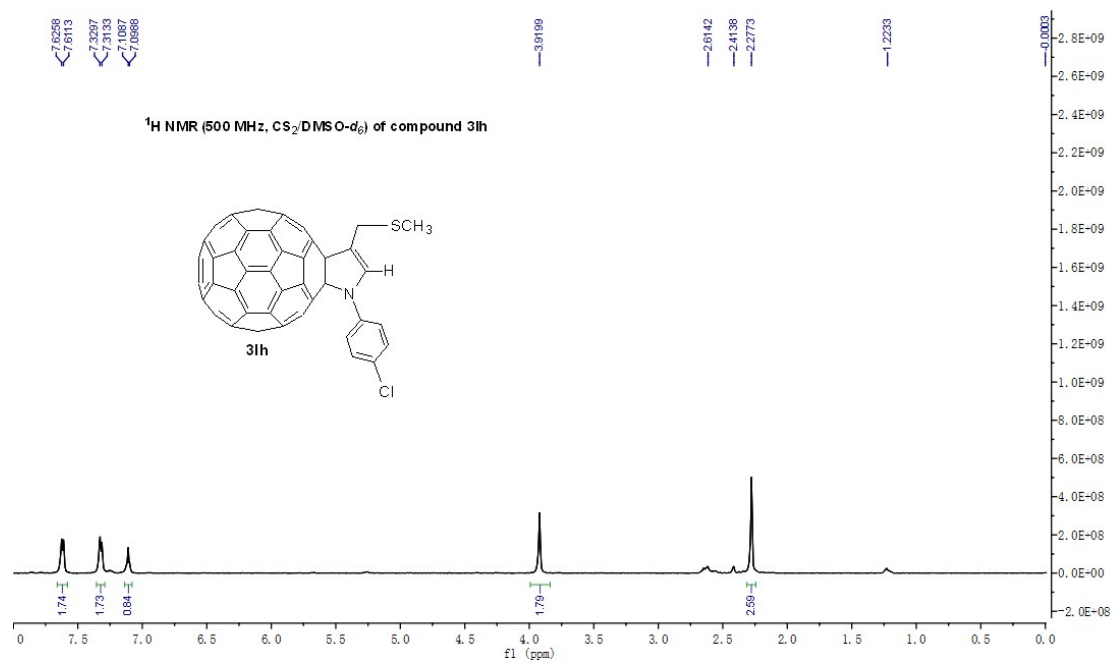



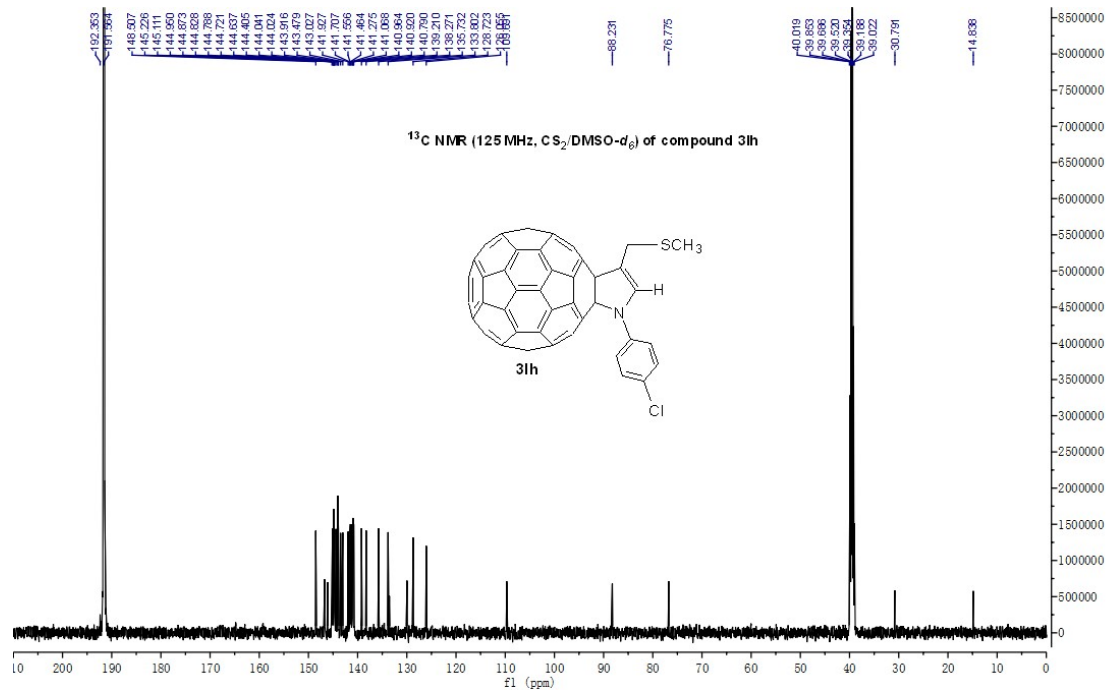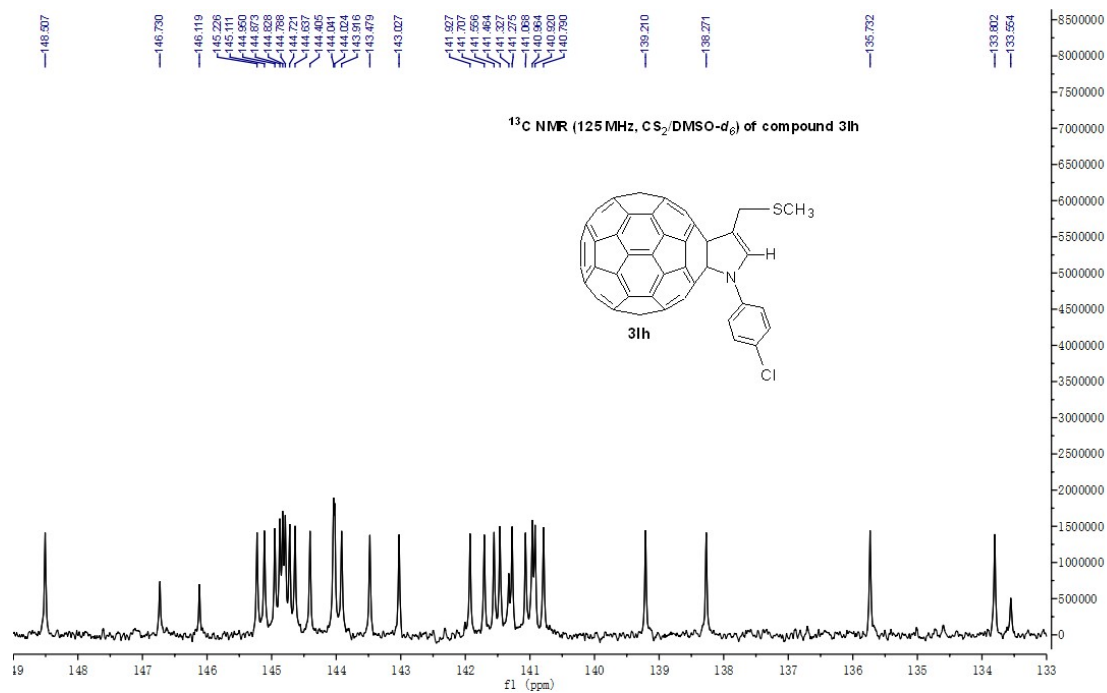



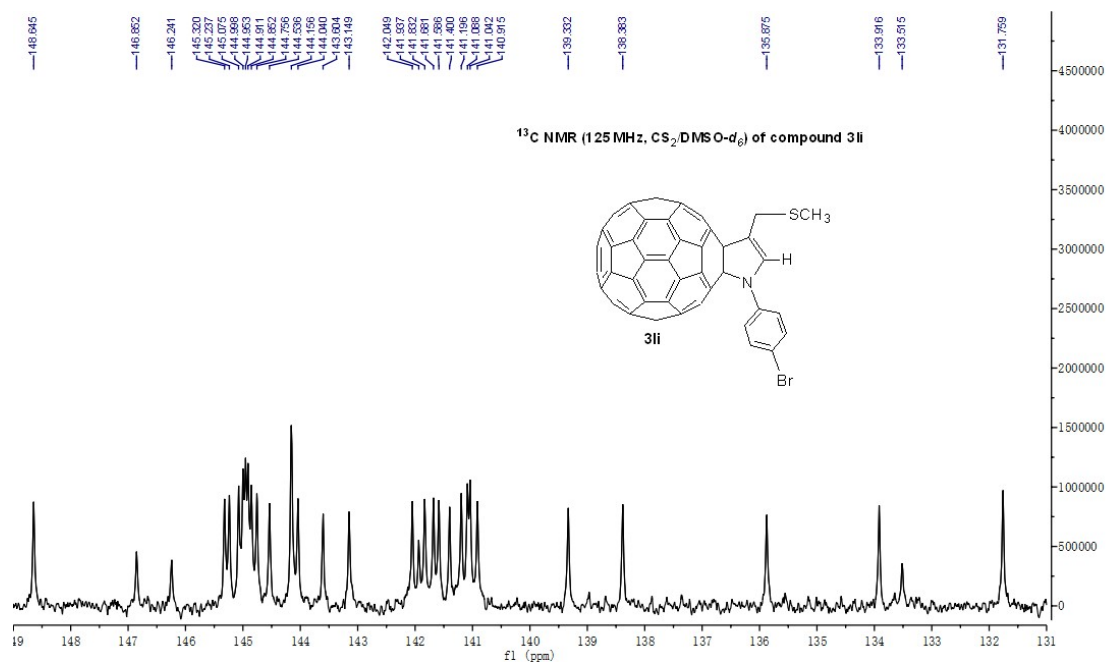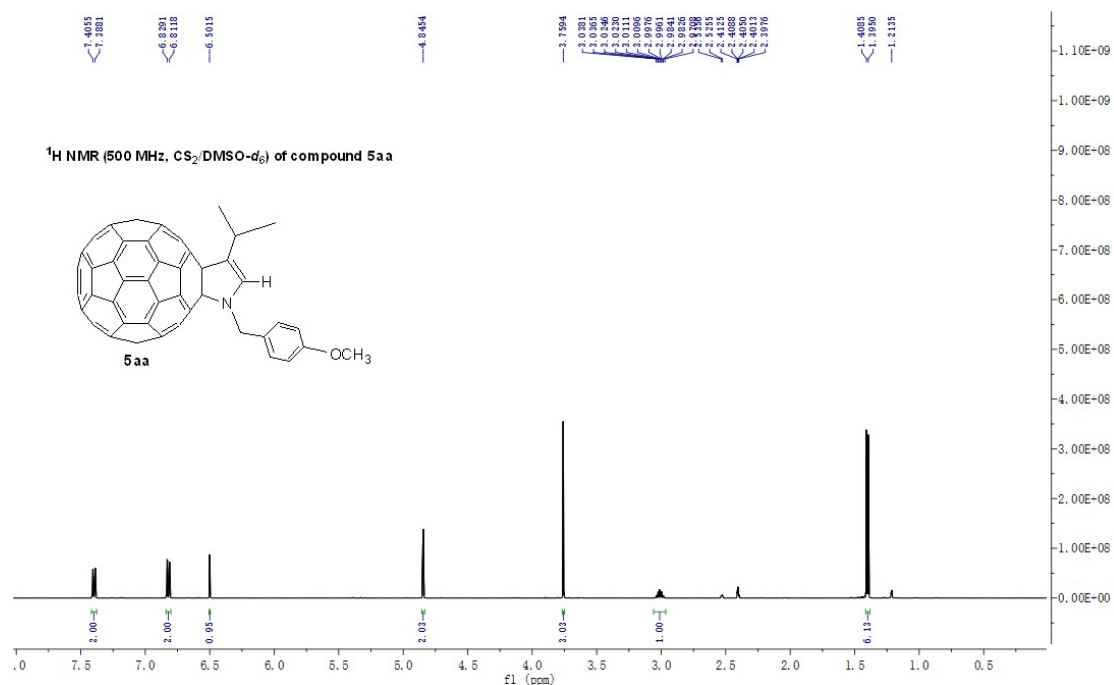

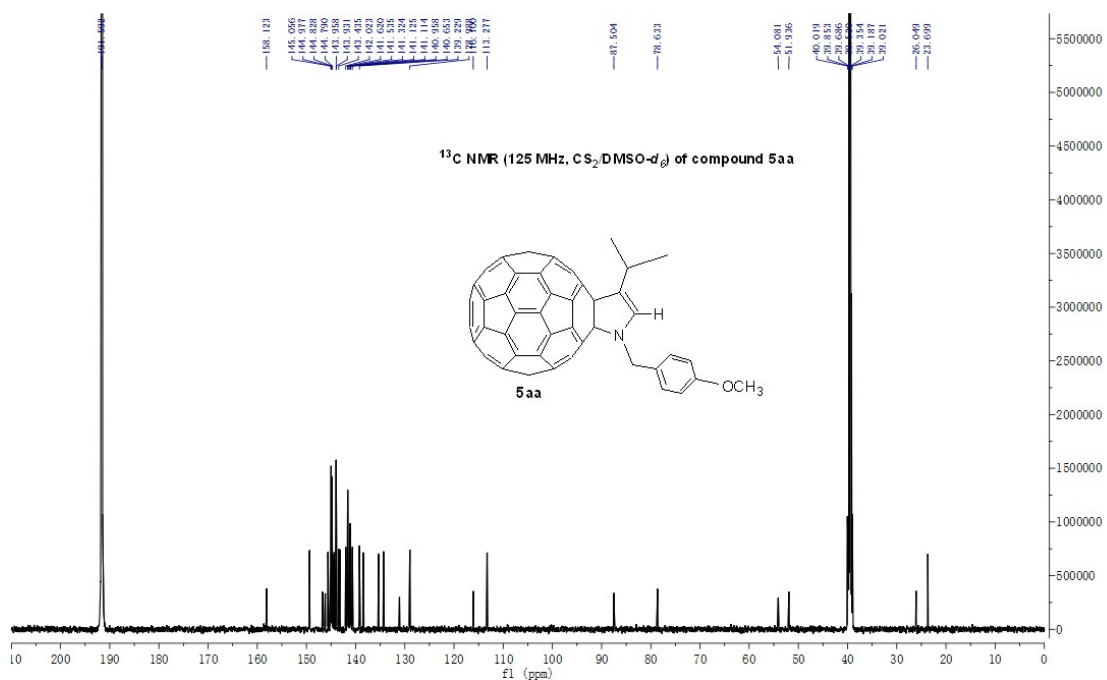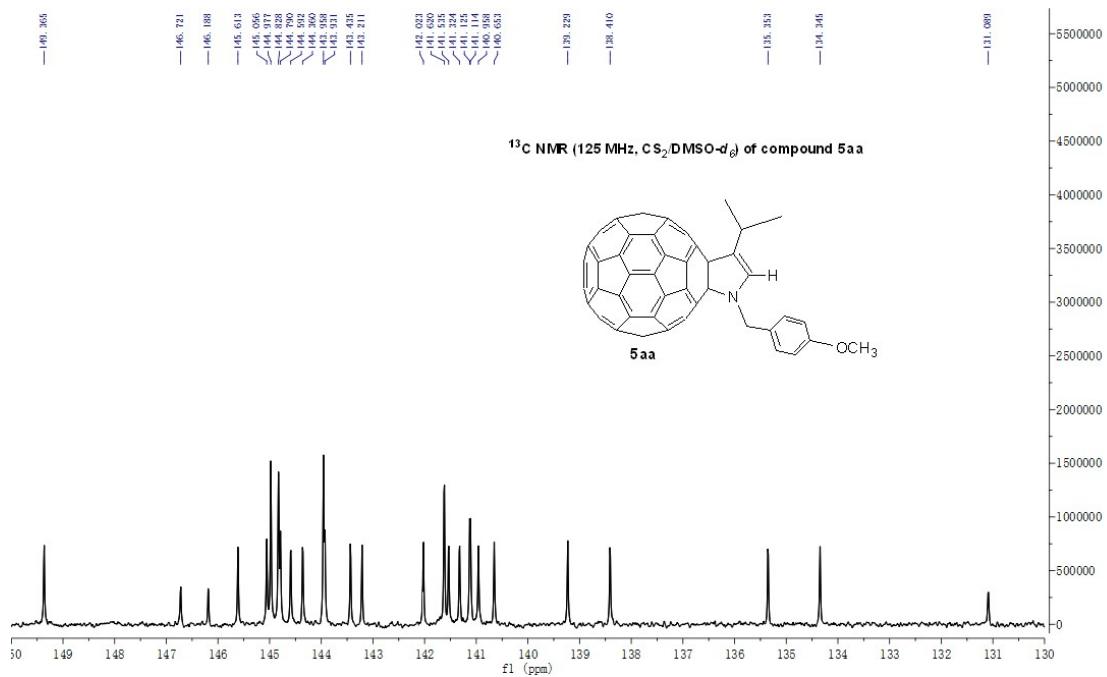

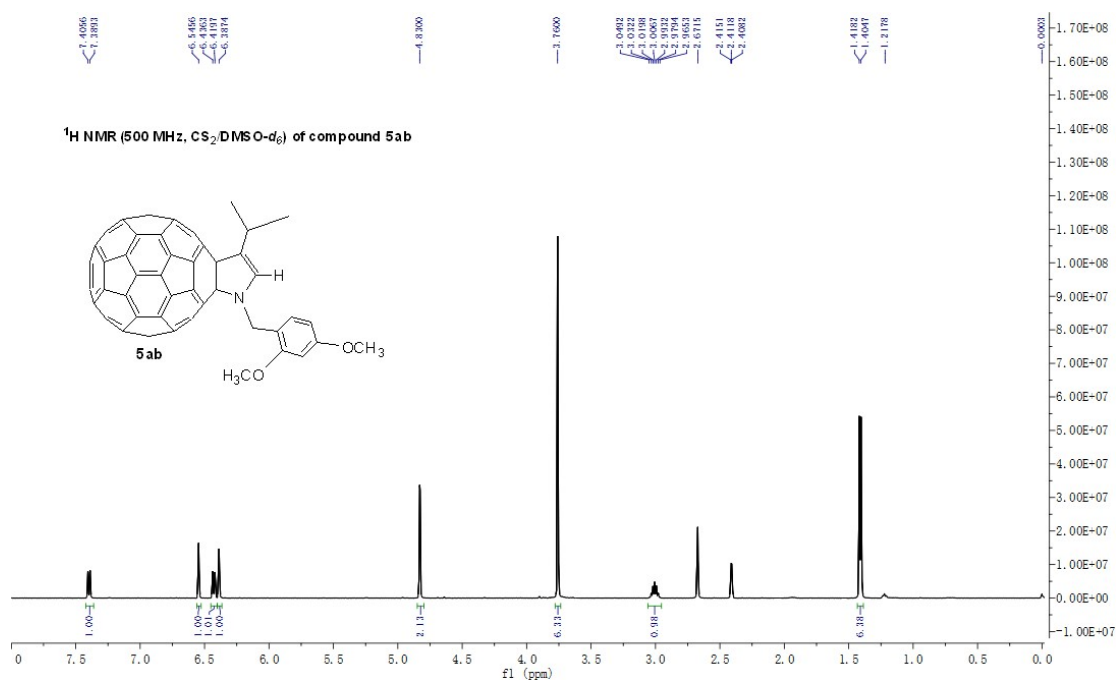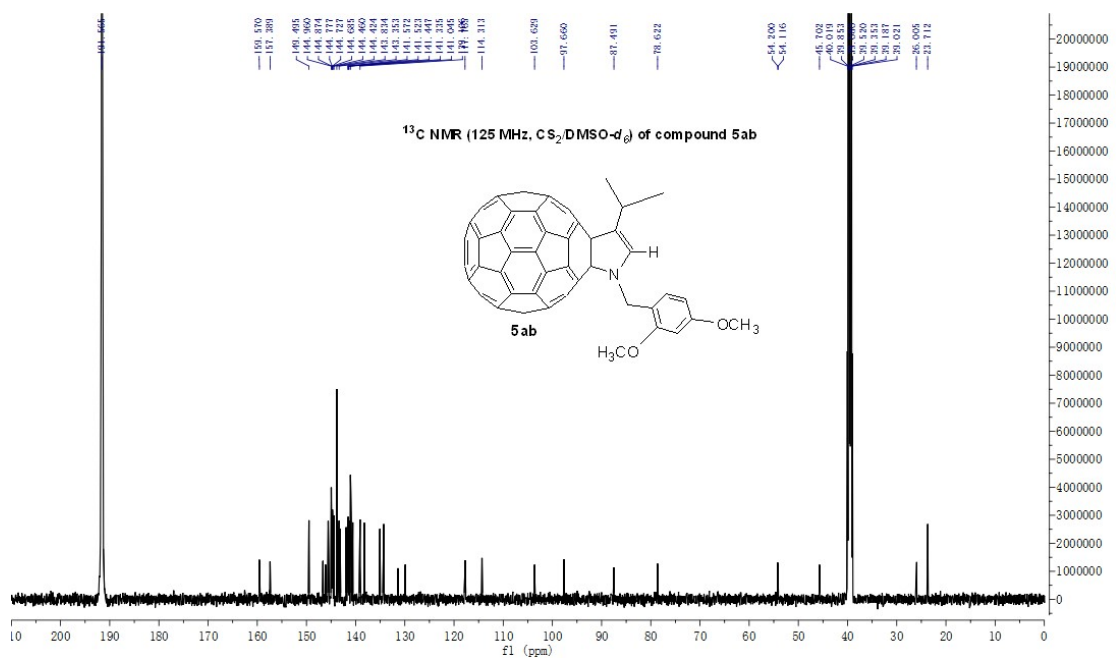

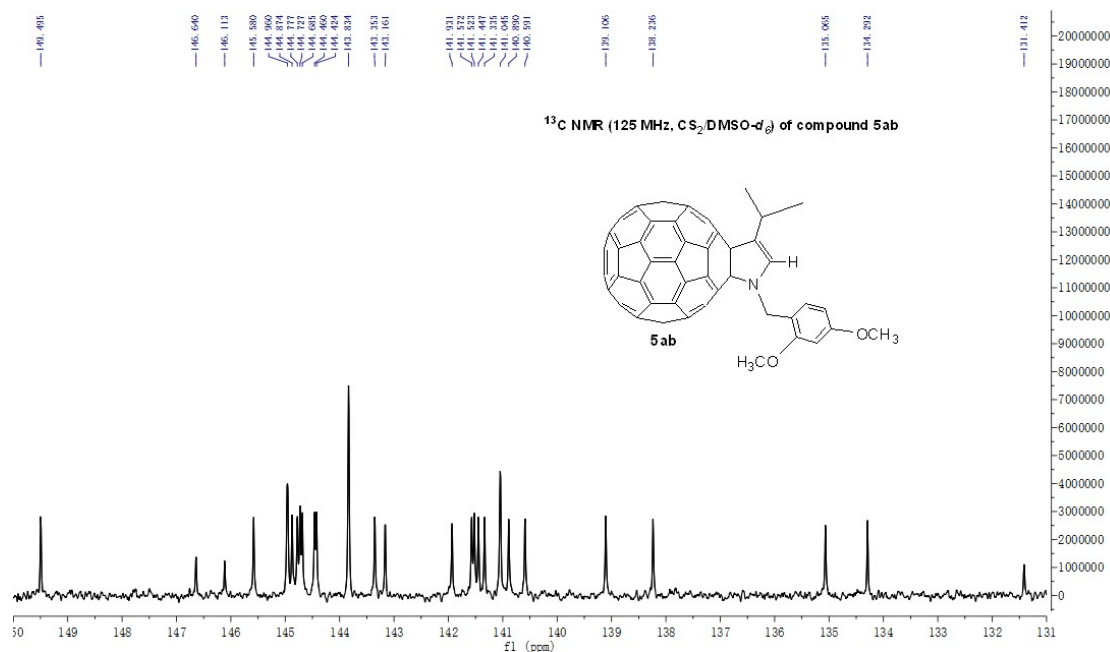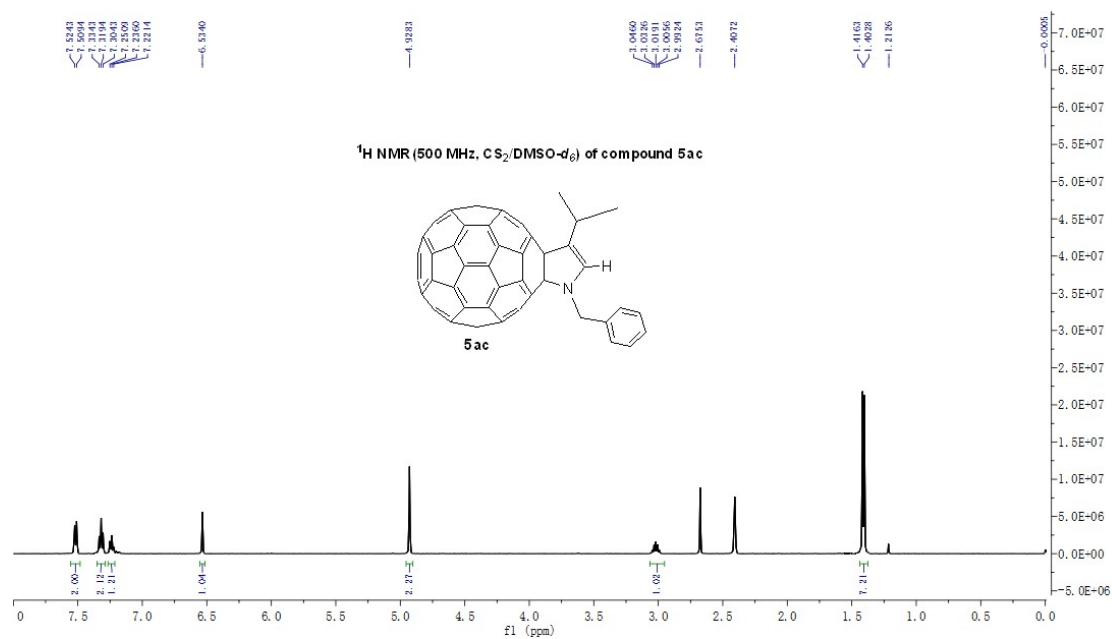

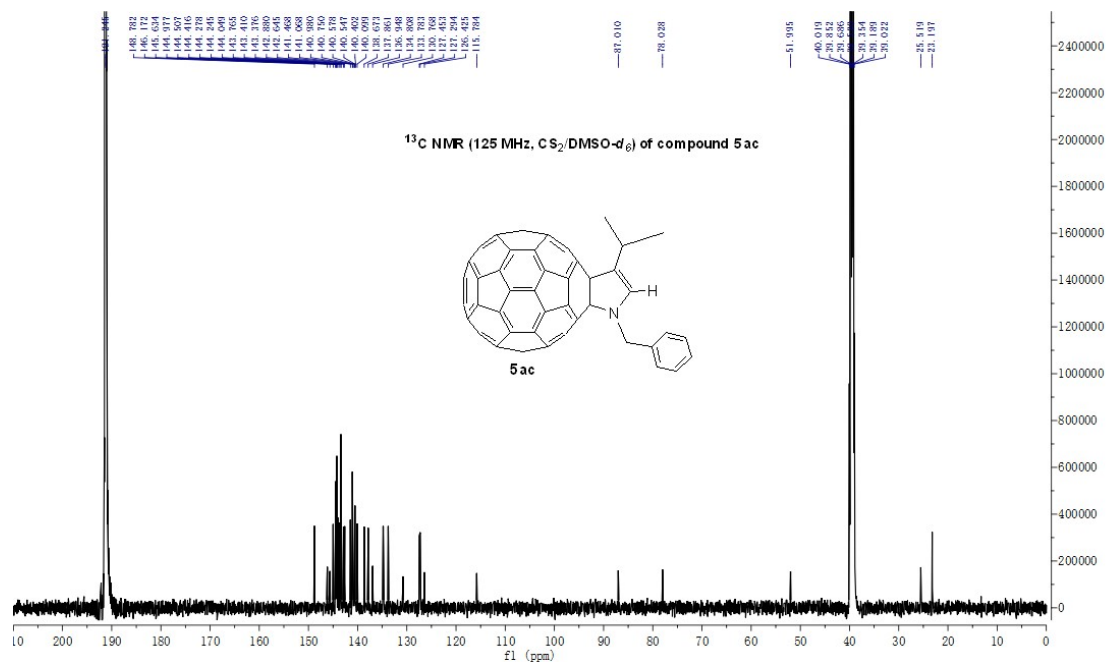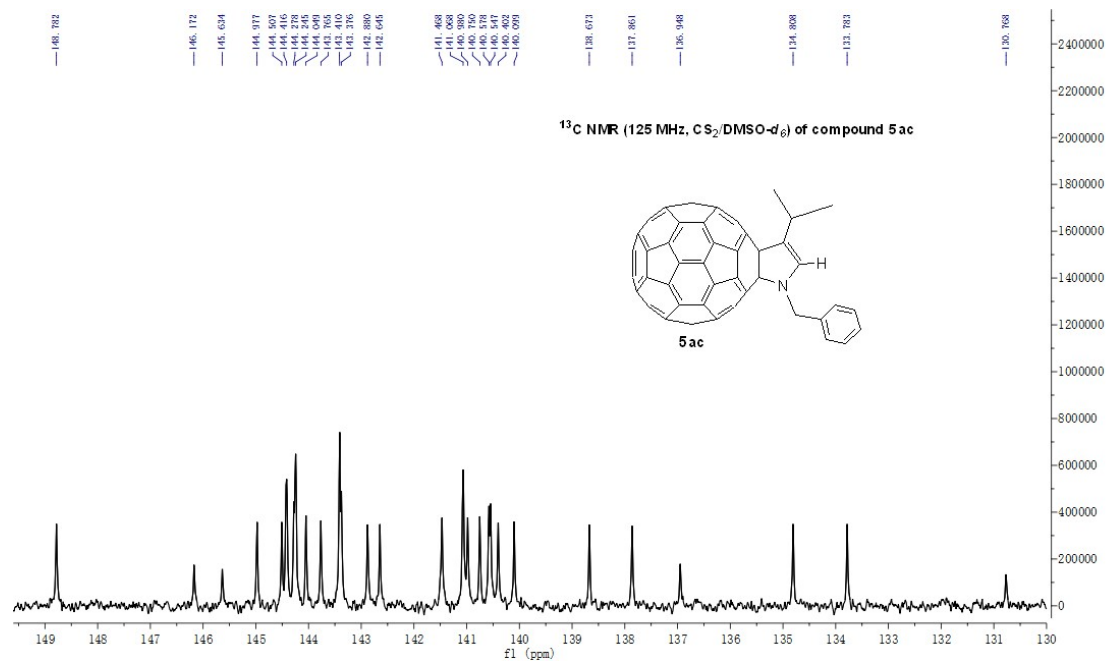

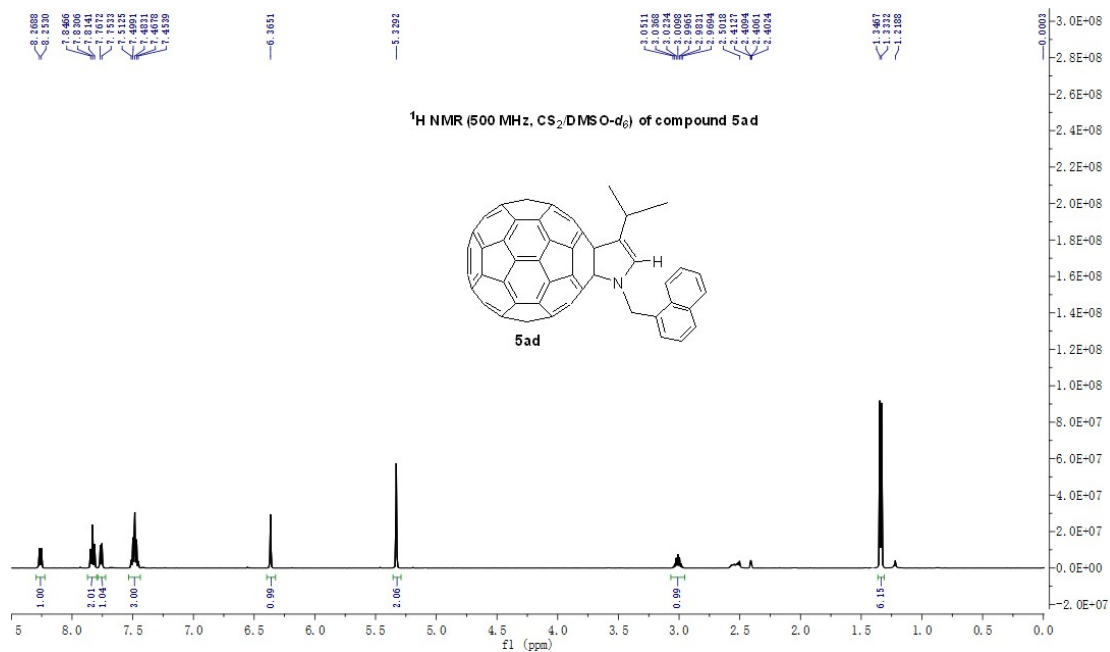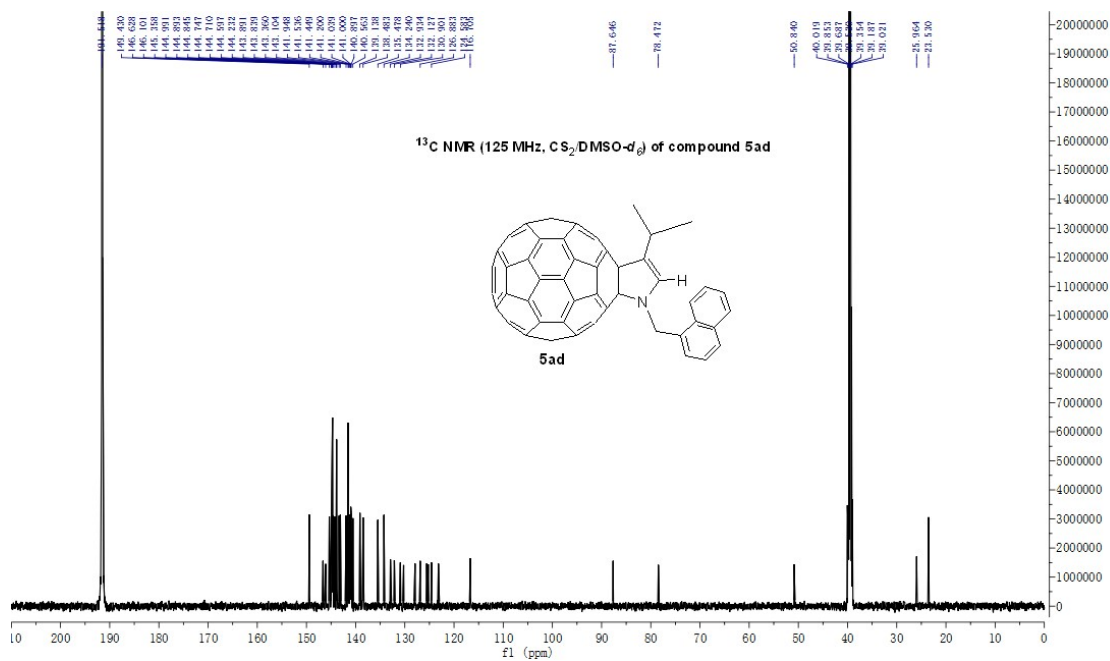



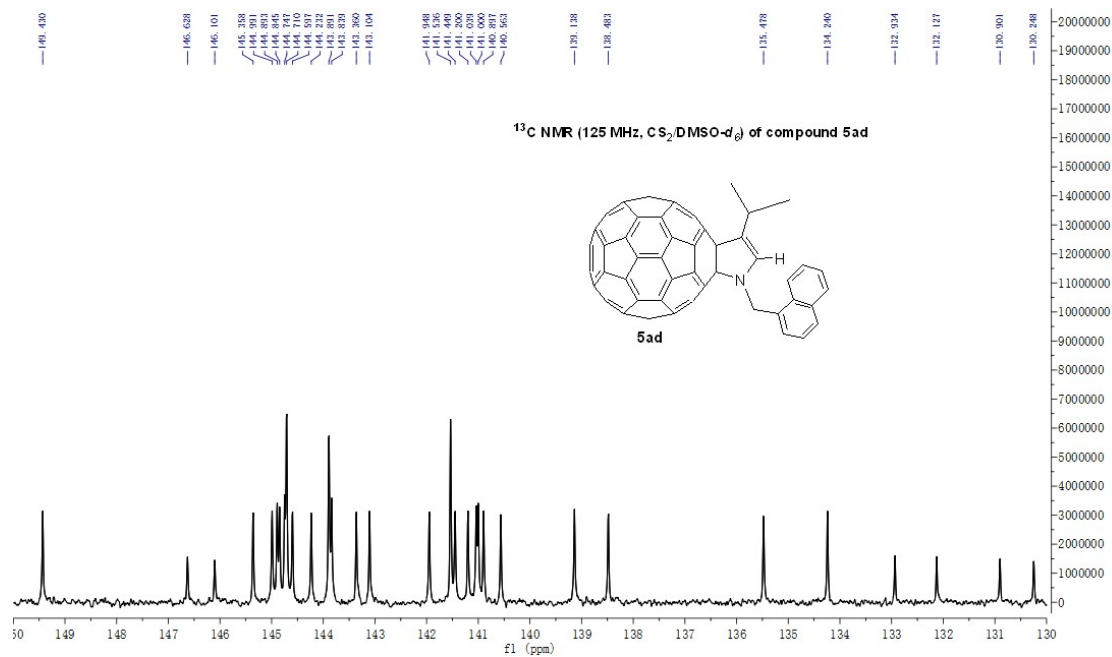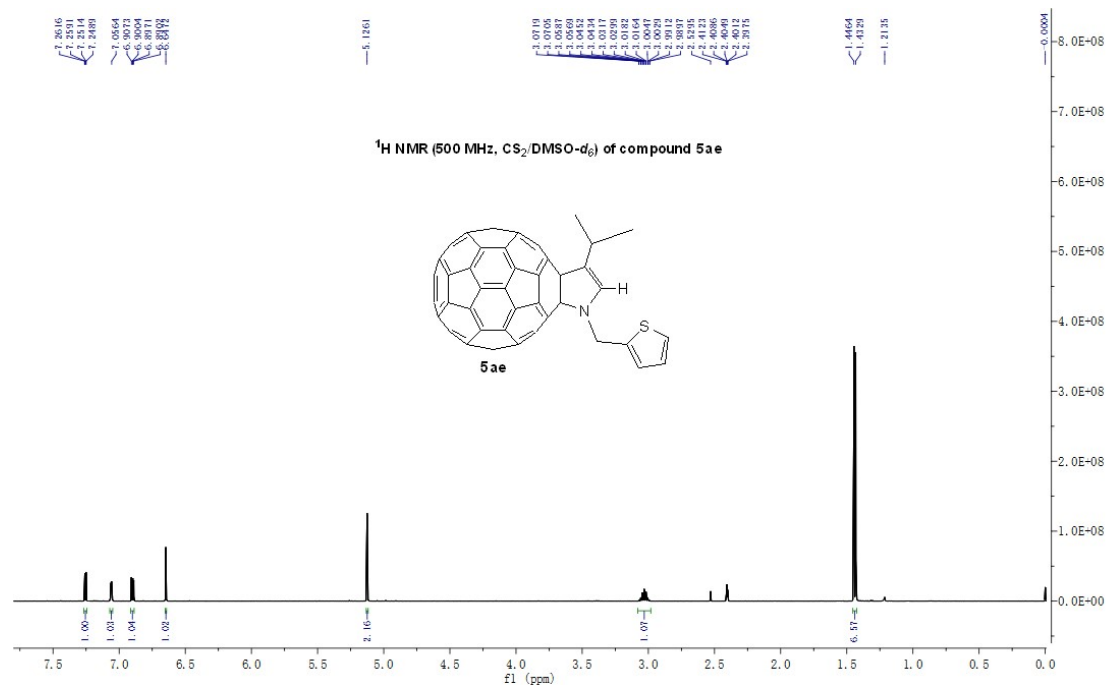



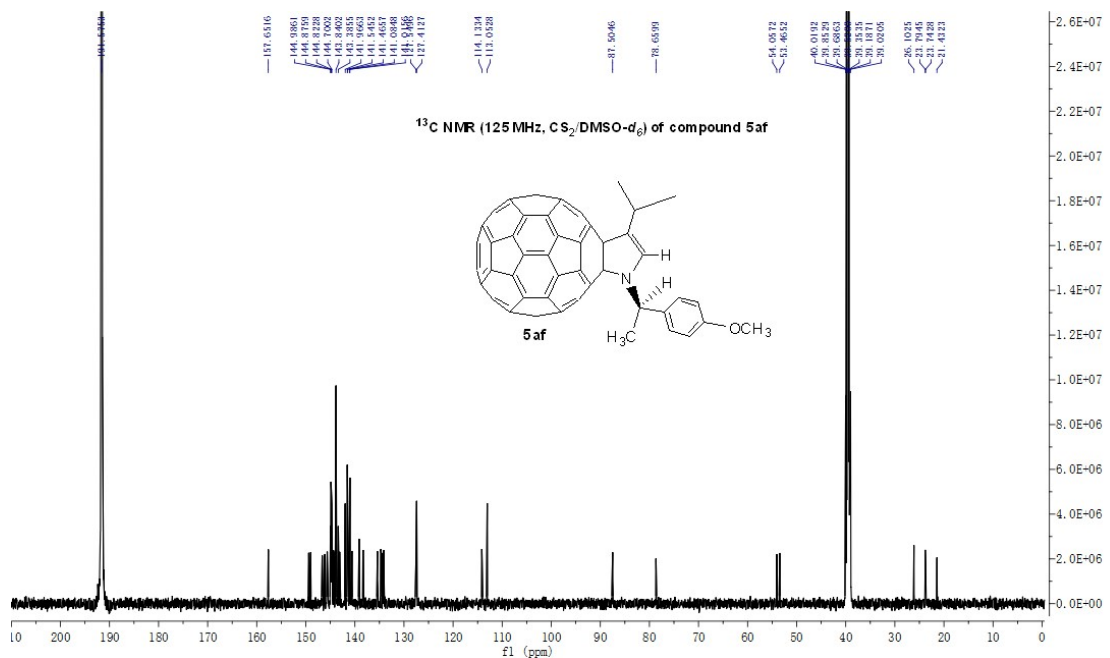

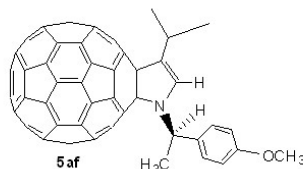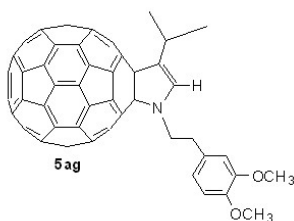

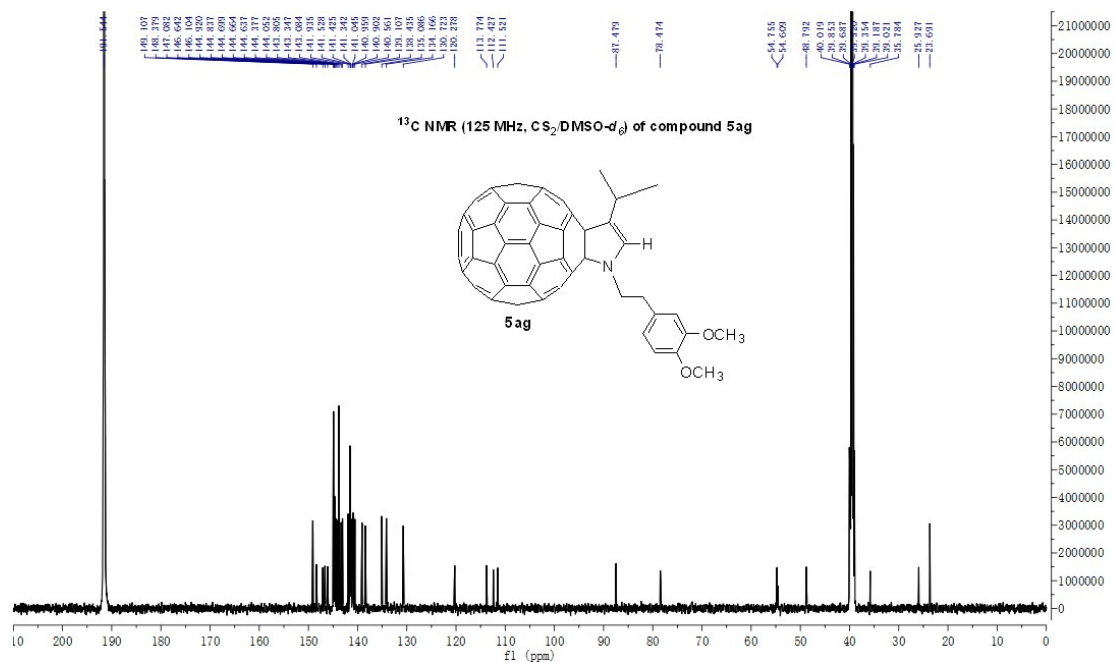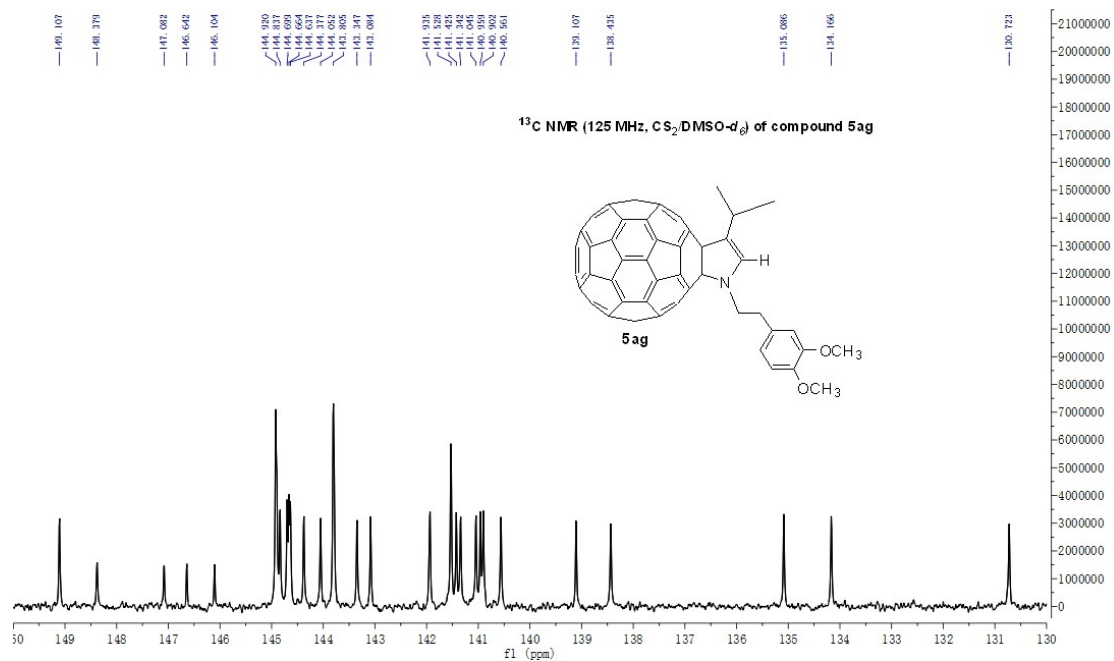

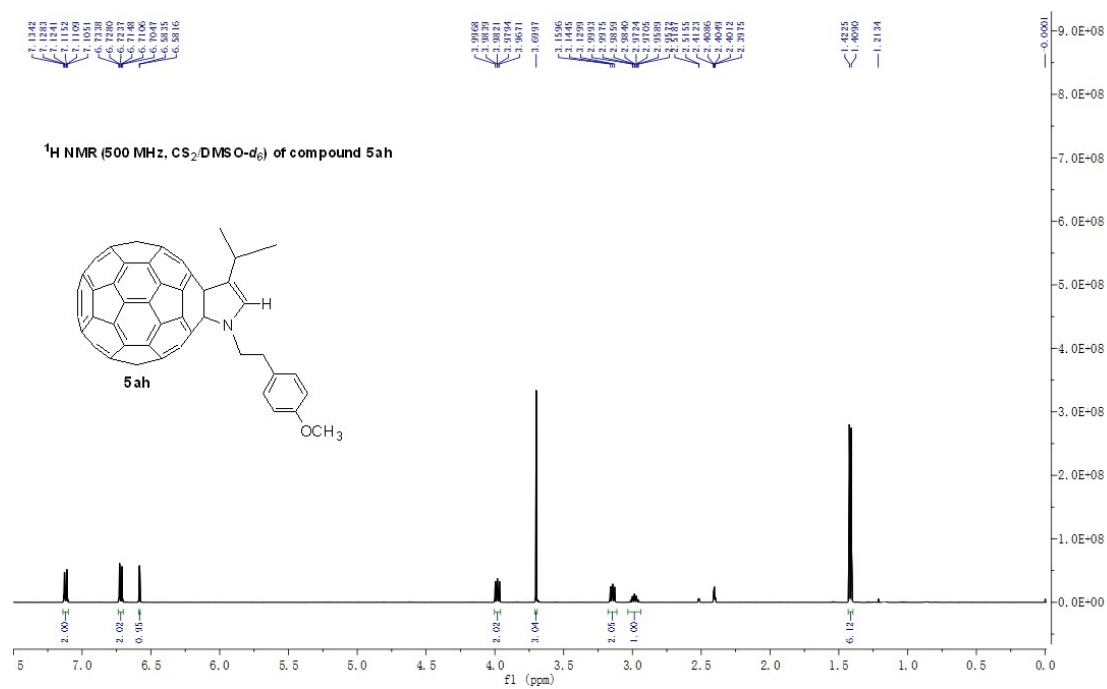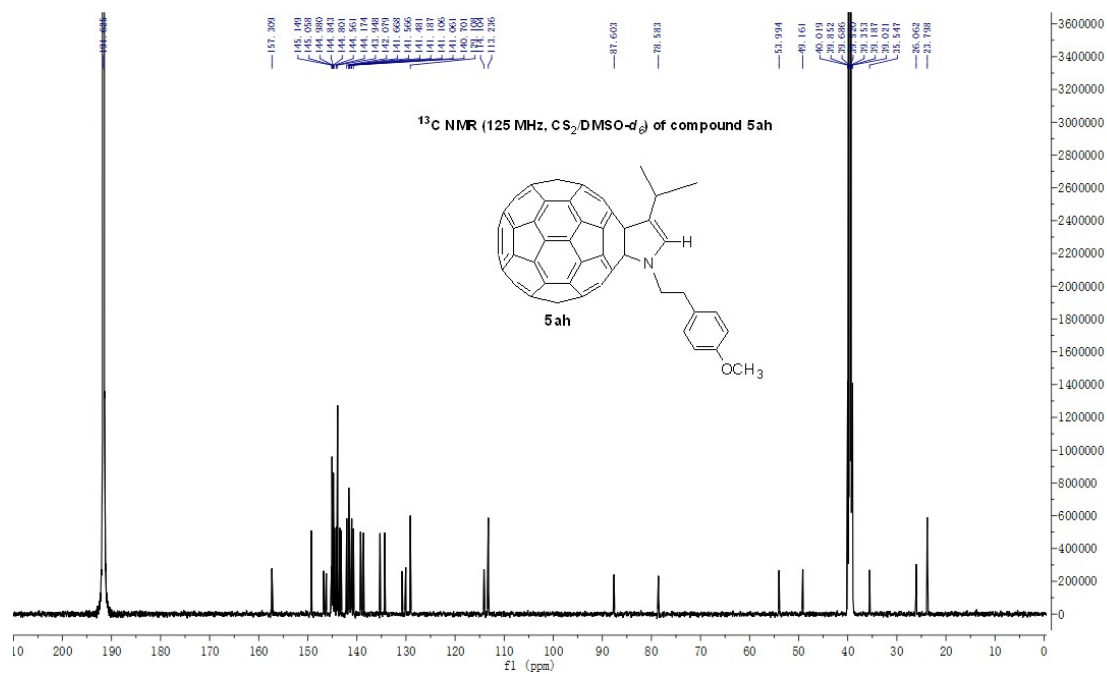

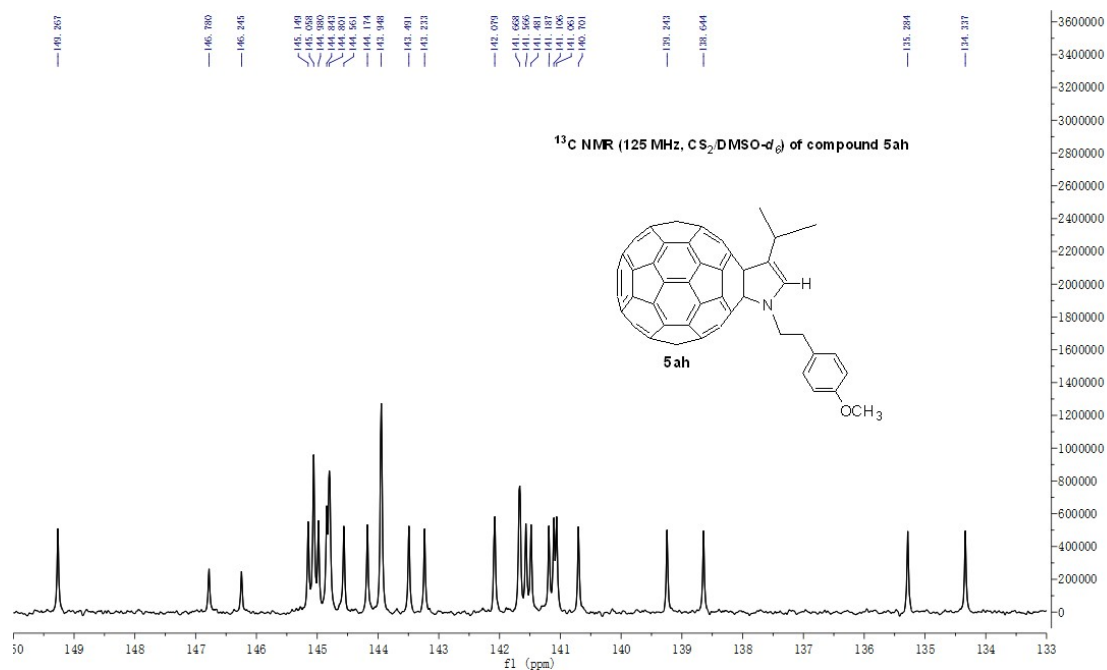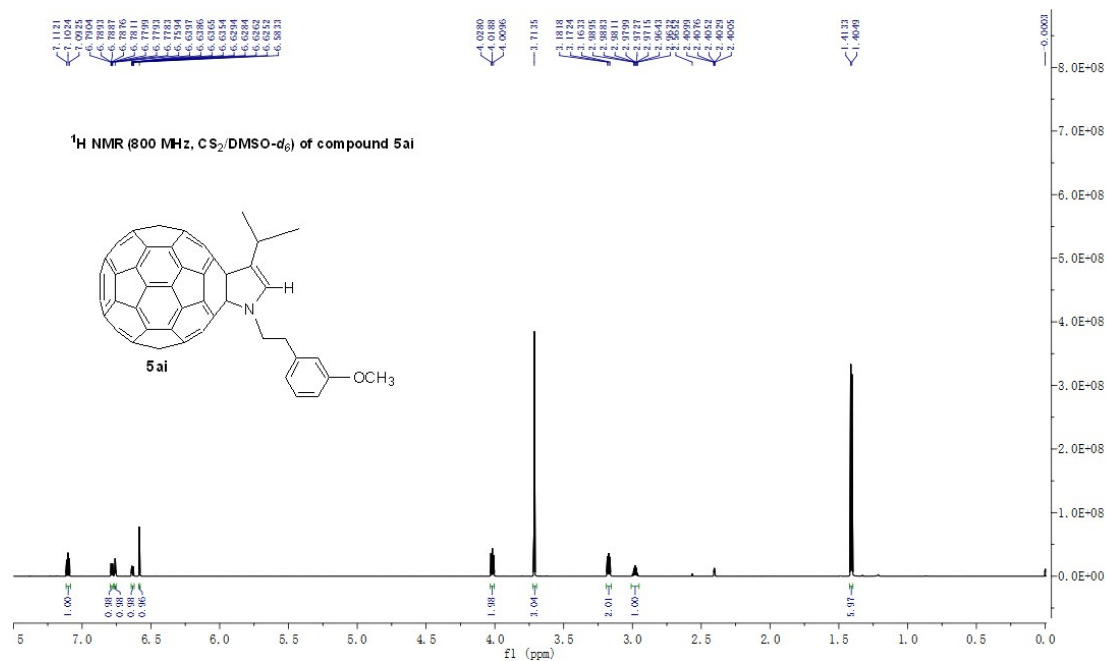

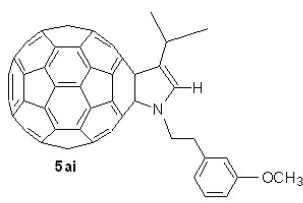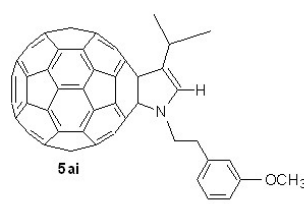



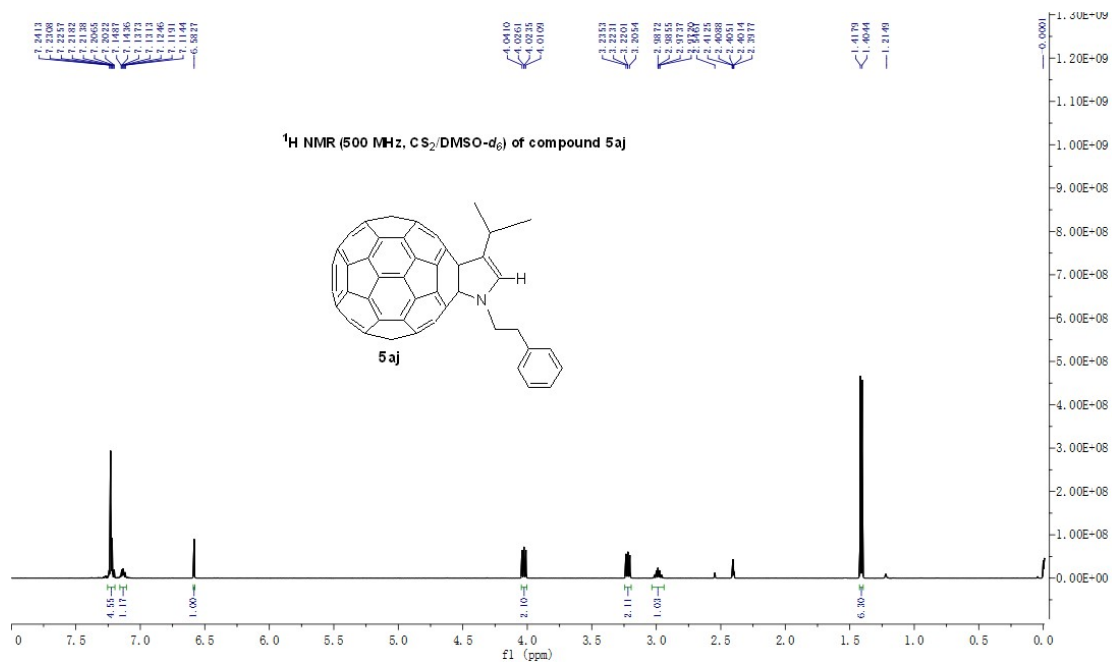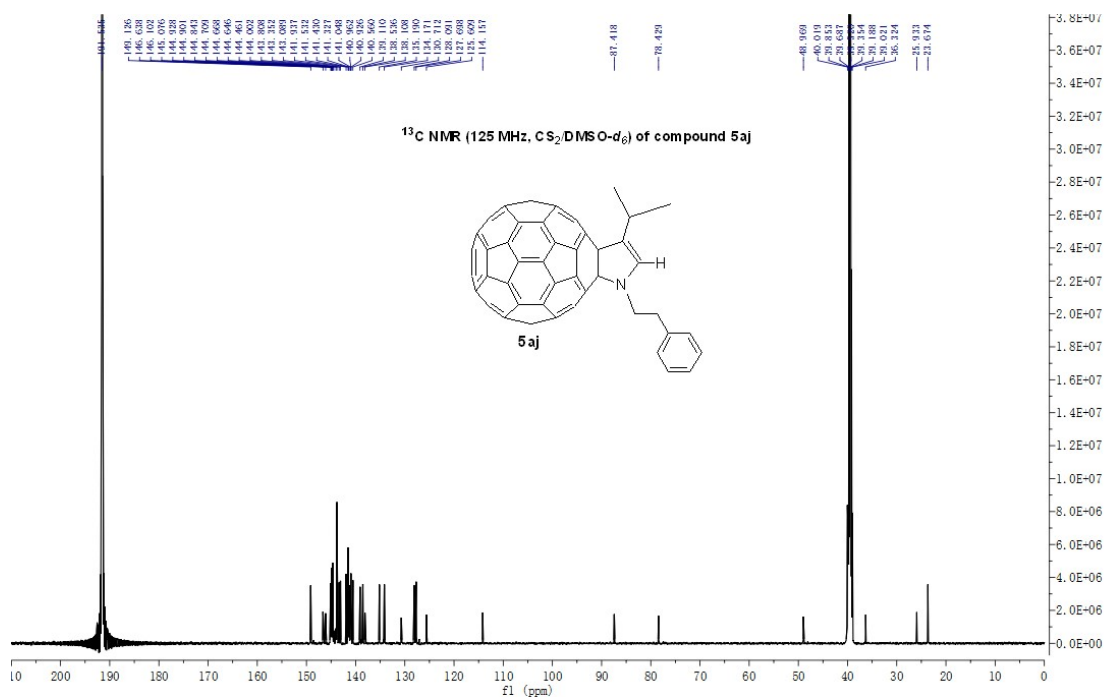

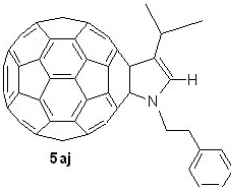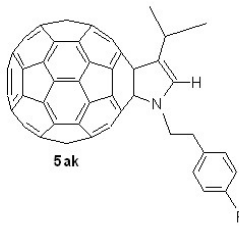

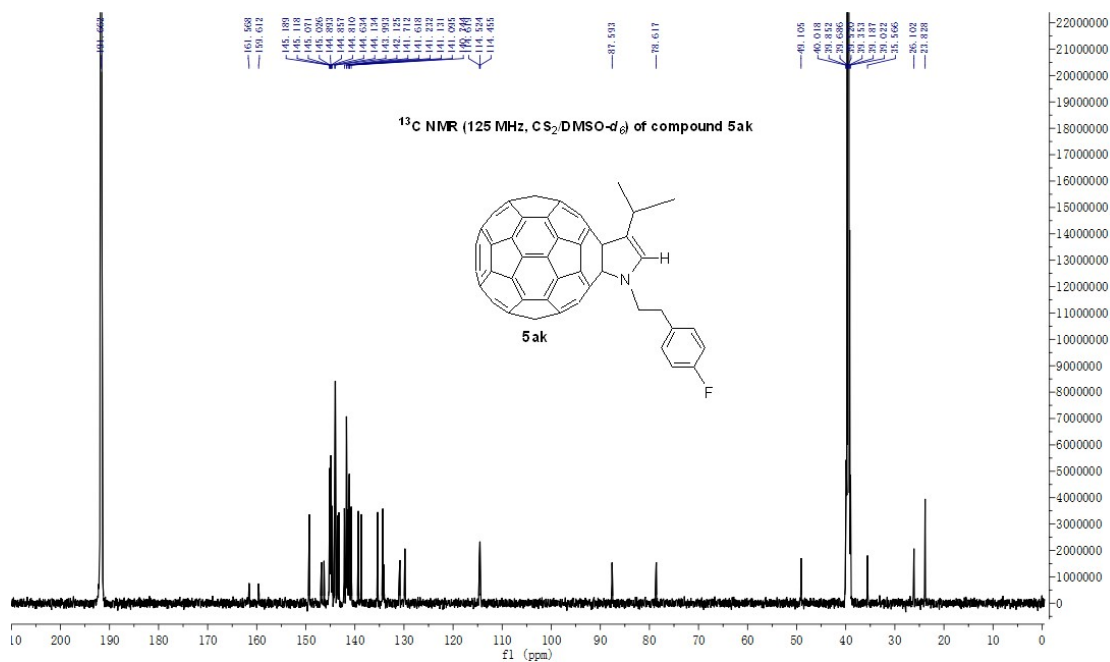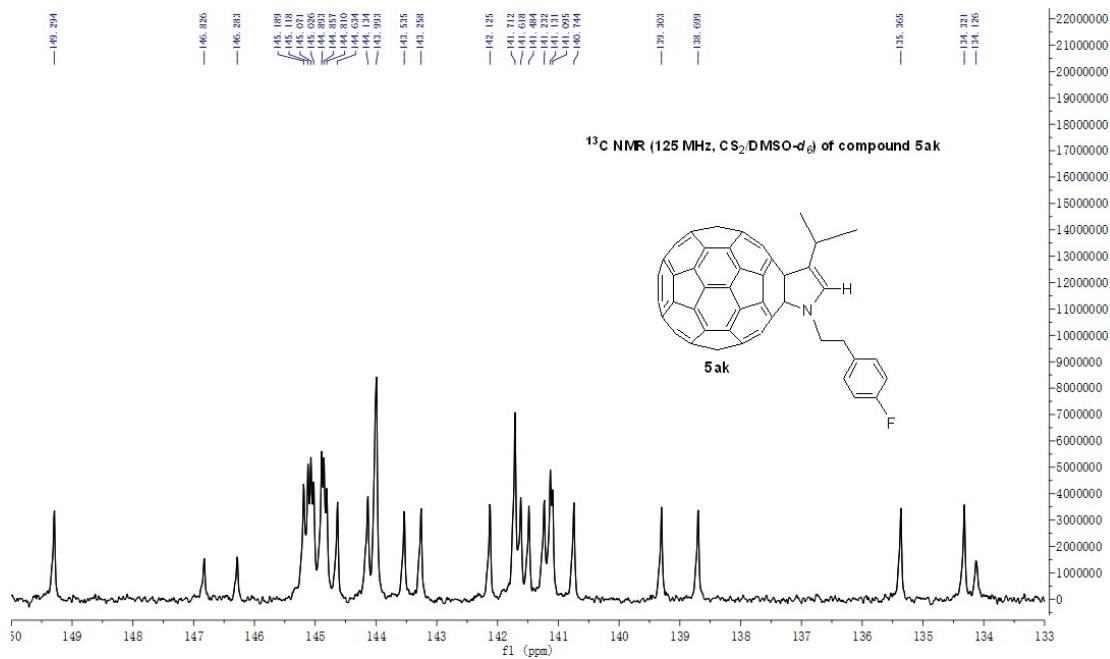

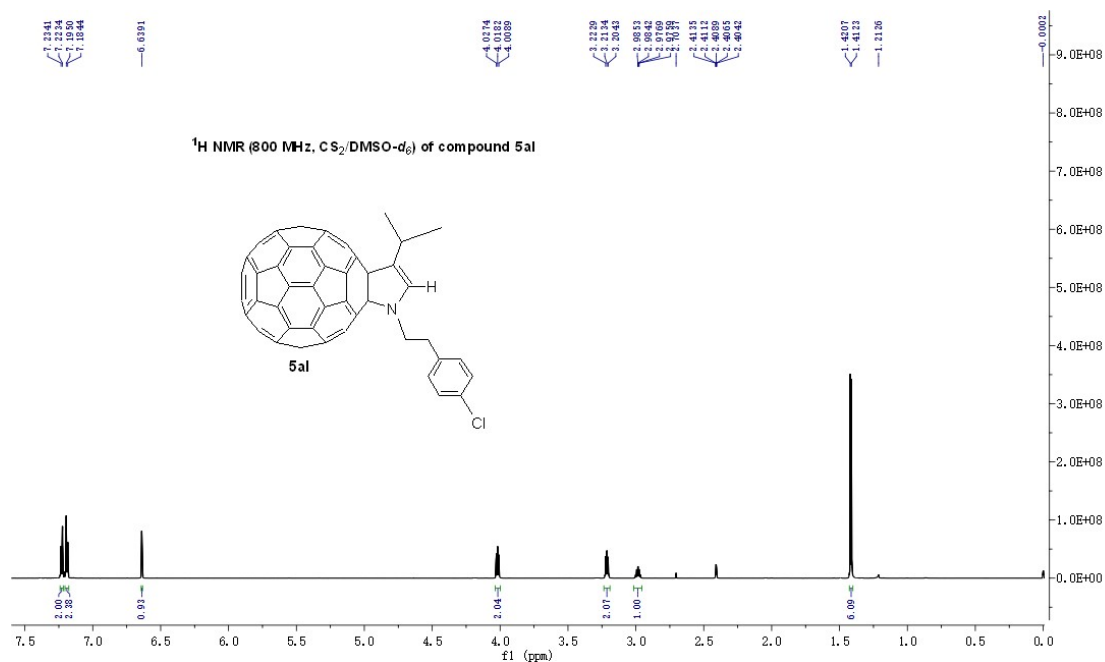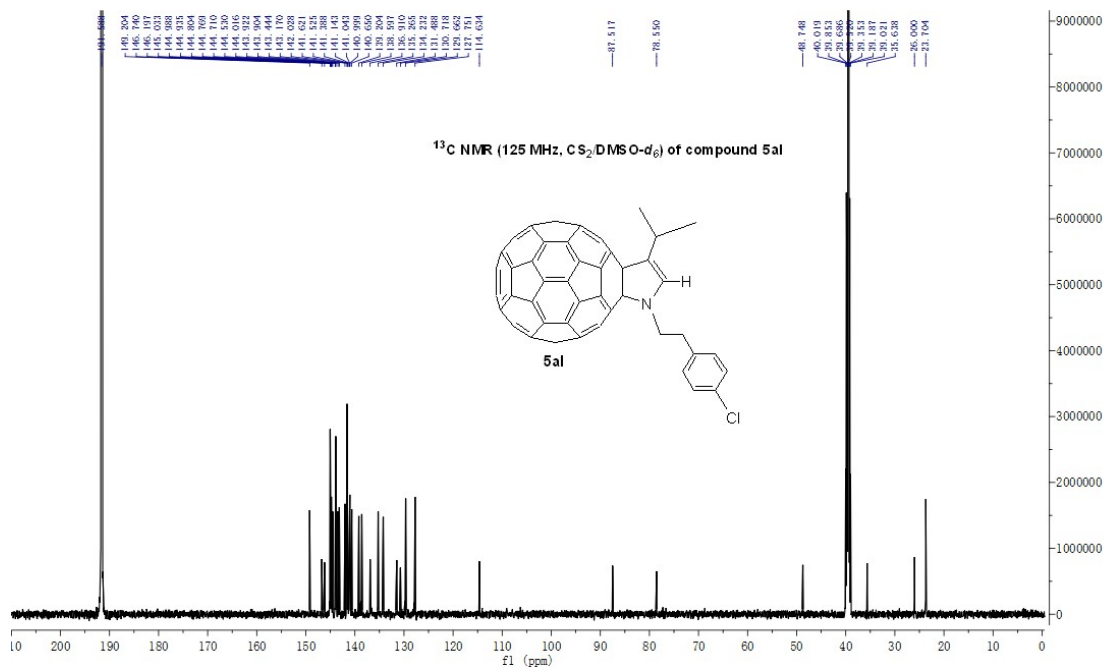

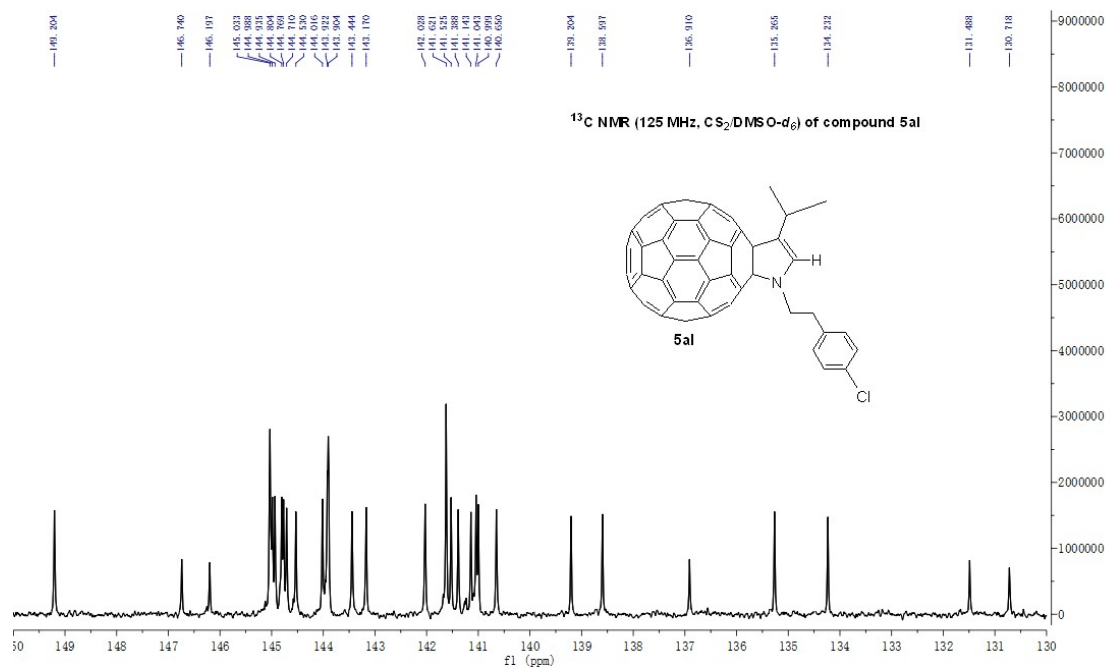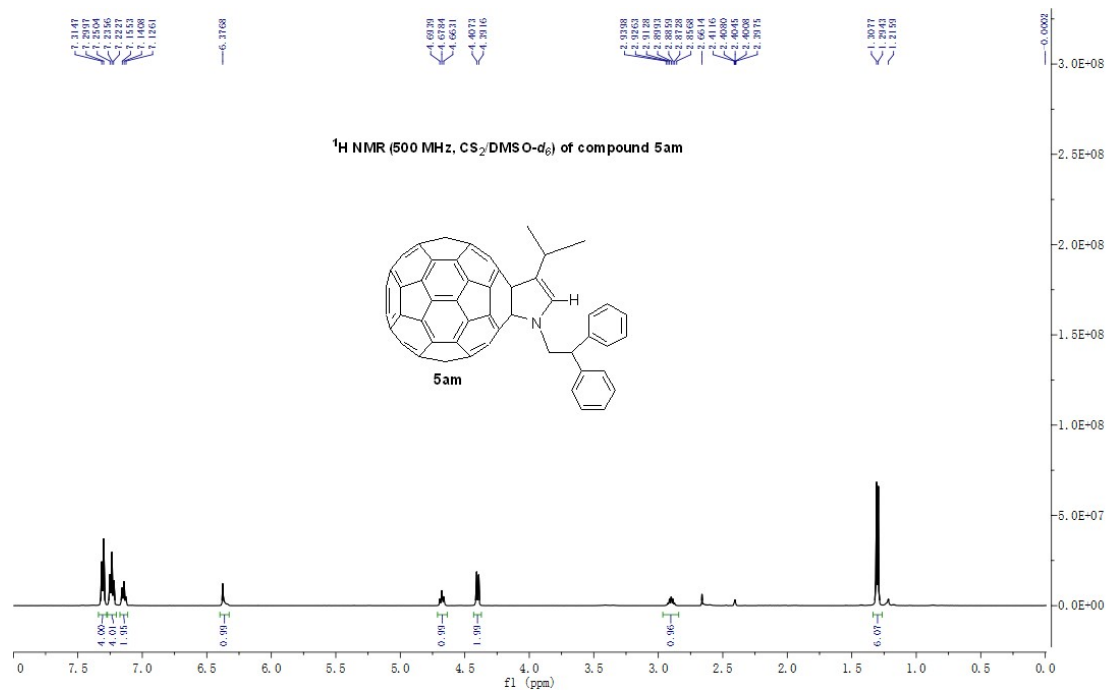

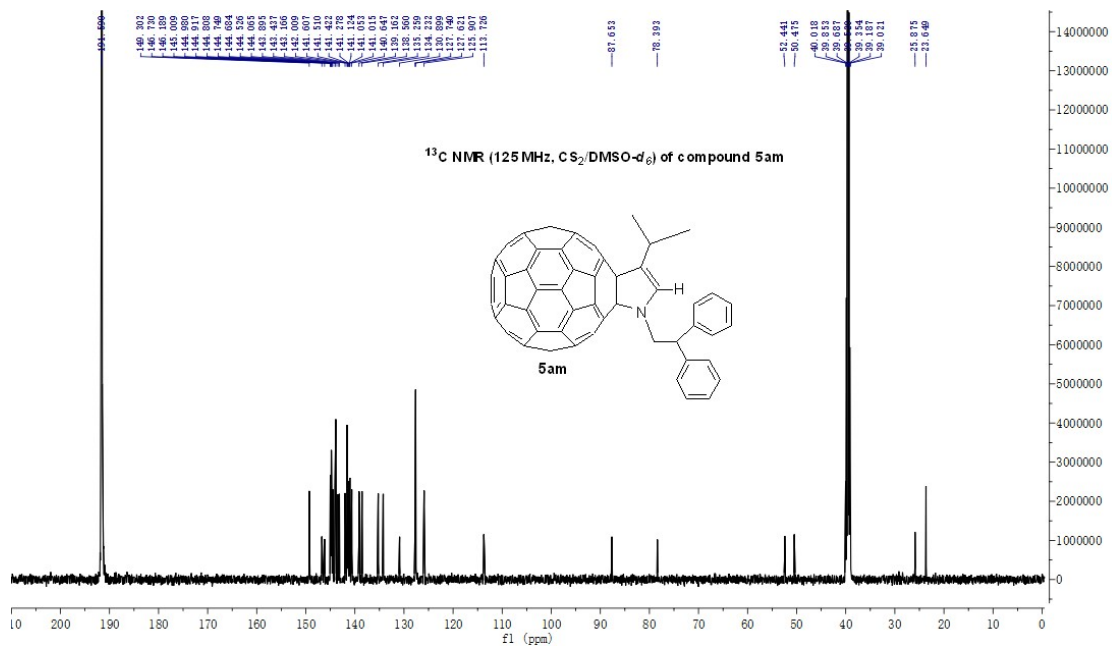







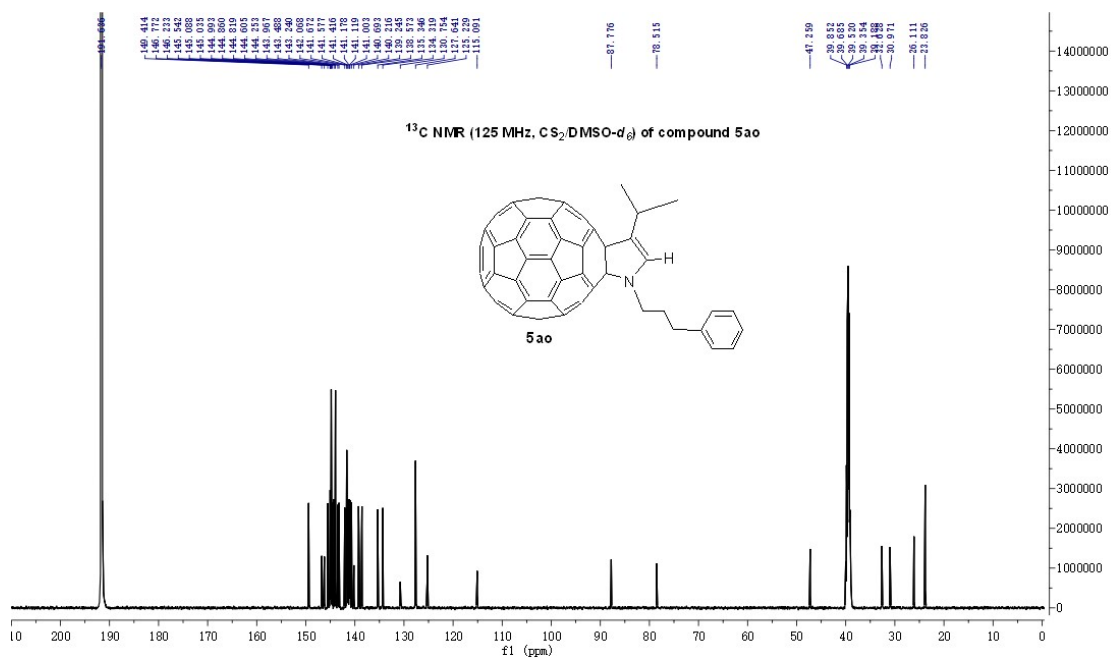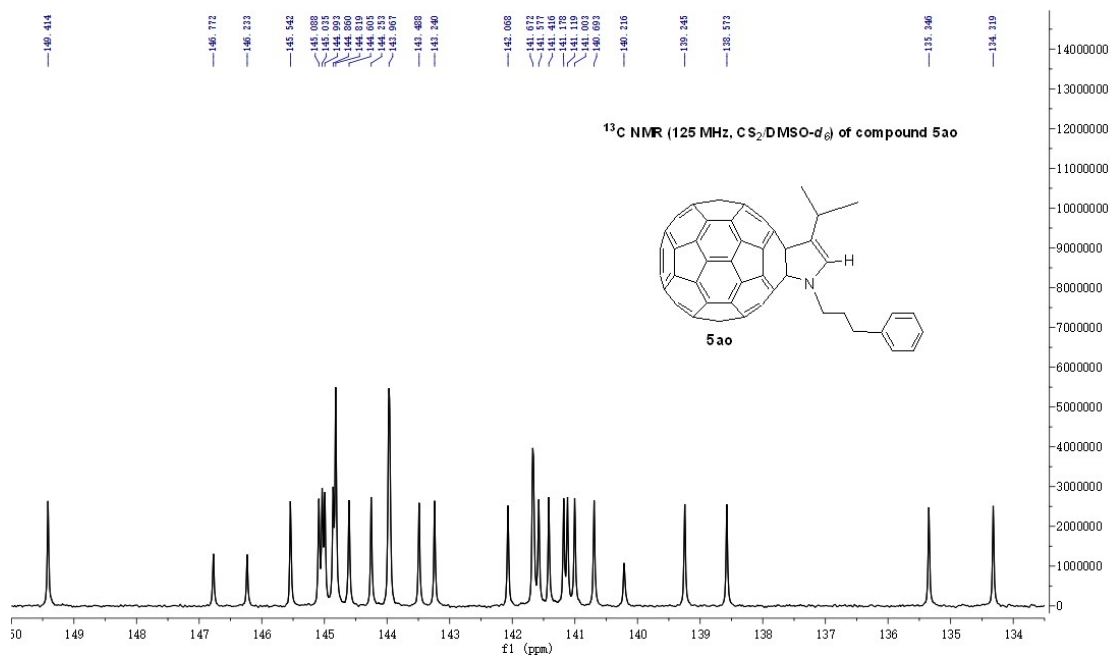

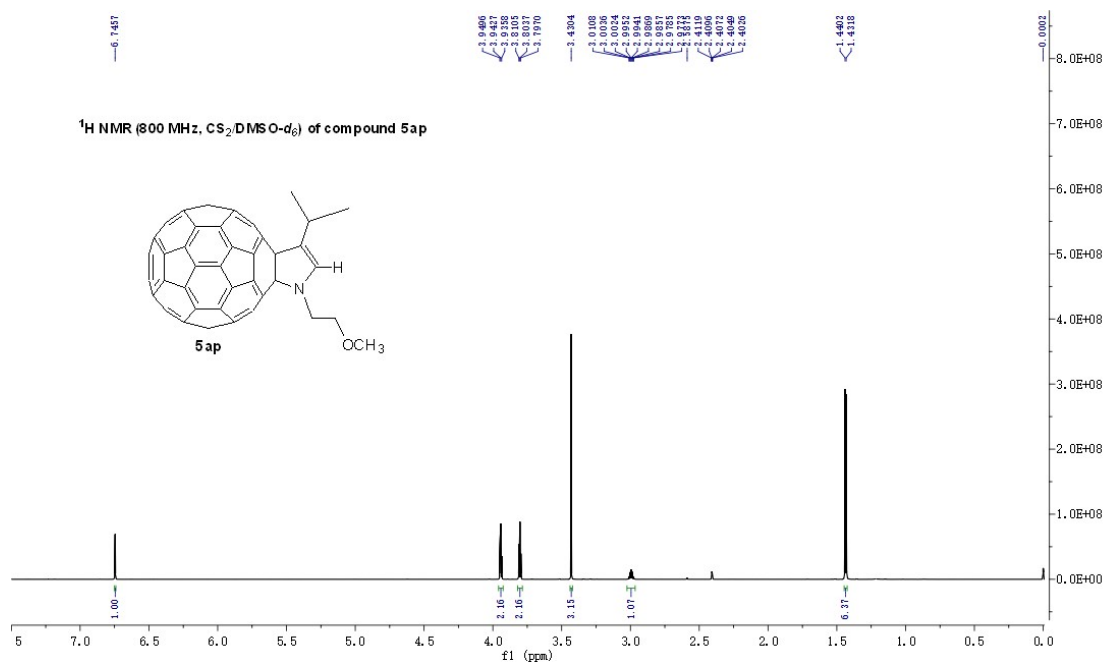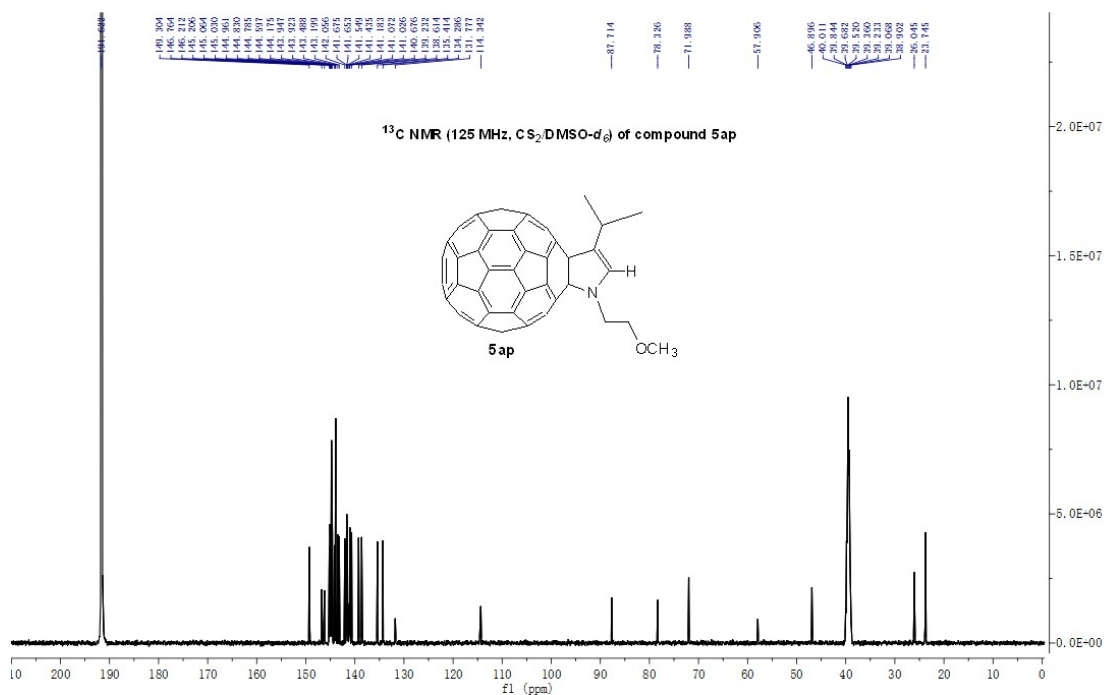

Supplement: d1ob01933c1.pdf [file d1ob01933c1.pdf]
